# Supplementary material for: Adaptive capacity of the Adjusted Clinical Groups Case-Mix System to the cost of primary healthcare in Catalonia (Spain): a observational study
Source: PubMed Central journal article supplement — BMJ Open. 2012 Jun 25;2(3):e000941. doi: 10.1136/bmjopen-2012-000941 (PMC3383978; doi:10.1136/bmjopen-2012-000941), 2012-06-25
Supplement: bmjopen-2012-000941.draft_revisions.pdf [file bmjopen-2012-000941.draft_revisions.pdf]

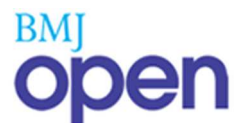

**Adaptive capacity of the Adjusted Clinical Groups Case-Mix System to the cost of primary health care in Catalonia (Spain): A Observational Study**

|                                 |                                                                                                                                                                                                                              |
|---------------------------------|------------------------------------------------------------------------------------------------------------------------------------------------------------------------------------------------------------------------------|
| Journal:                        | <i>BMJ Open</i>                                                                                                                                                                                                              |
| Manuscript ID:                  | bmjopen-2012-000941                                                                                                                                                                                                          |
| Article Type:                   | Research                                                                                                                                                                                                                     |
| Date Submitted by the Author:   | 28-Jan-2012                                                                                                                                                                                                                  |
| Complete List of Authors:       | Sicras-Mainar, Antoni; Badalona Serveis Assistencials SA, Directorate of Planning<br>Velasco-Velasco, Soledad<br>Navarro-Artieda, Ruth<br>Prados-Torres, Alexandra<br>Bolibar-Ribas, Buenaventura<br>Violan-Fors, Concepción |
| <b>Primary Subject Heading</b>: | Health services research                                                                                                                                                                                                     |
| Secondary Subject Heading:      | Epidemiology                                                                                                                                                                                                                 |
| Keywords:                       | EPIDEMIOLOGY, PUBLIC HEALTH, PRIMARY CARE                                                                                                                                                                                    |
|                                 |                                                                                                                                                                                                                              |

SCHOLARONE™  
Manuscripts

**TITLE PAGE****Adaptive capacity of the Adjusted Clinical Groups Case-Mix System to the cost of primary health care in Catalonia (Spain): A Observational Study****Authors**

Antoni Sicras-Mainar

Directorate of Planning. Badalona Serveis Assistencials SA, Badalona, Barcelona, Spain

[asicras@bsa.cat](mailto:asicras@bsa.cat)

Soledad Velasco-Velasco

Directorate of Planning. Badalona Serveis Assistencials SA, Badalona, Barcelona, Spain

[svelasco@bsa.cat](mailto:svelasco@bsa.cat)

Ruth Navarro-Artieda

Medical Documentation. Hospital Universitari Germans Trias i Pujol, Badalona, Barcelona, Spain

[rnavarro.germanstrias@gencat.cat](mailto:rnavarro.germanstrias@gencat.cat)

Alexandra Prados-Torres

Health Sciences Institute of Aragon, Zaragoza, Spain

[sprados.iacs@aragon.es](mailto:sprados.iacs@aragon.es)

Buenaventura Bolibar-Ribas

Jordi Gol i Gurina Primary Health Care Research Institute. IDIAP, Barcelona, Spain

[bbolibar@fundaciojgol.org](mailto:bbolibar@fundaciojgol.org)

Concepción Violan-Fors

Jordi Gol i Gurina Primary Health Care Research Institute. IDIAP, Barcelona, Spain

[cviolan@fundaciojgol.org](mailto:cviolan@fundaciojgol.org)

for the ACG Study Group<sup>1</sup>

<sup>1</sup>) The ACG Study Group is formed by: Catalonia (Alba Aguado Joda, Milagrosa Blanca-Tamayo, Esperanza Escribano-Herranz, Ferran Flor-Serra, Josep Ram3n Llopart-L3pez, Daniel Rodr3guez-L3pez, Encarna S3nchez-Fontcuberta, Josep Maria Vilaseca-Llobet), Balearic Islands (Jos3 Estelrich-Bennasar, Vicente Juan Verger, Mar3a Ant3nia Mir-Pons, Mar3a Vega Mart3n-Mart3n, Juan Antonio P3rez-Artigues, Amador Ru3z Torrej3n) and Aragon (Jos3 Mar3a Abad-D3ez, Mar3a Mercedes Aza Pascual-Salcedo, Daniel Bordonaba-Bosque, Amaya Calder3n-Larrañaga, Francisca Gonz3lez-Rubio, Anselmo L3pez-Cabañas, Jes3s Magdalena-Belio, Beatriz Poblador-Plou, Antonio Poncel-Falc3).

**Correspondence to:**

Antoni Sicras Mainar

C. Gaietà Soler, 6-8 entlo . 08911 Badalona. Barcelona.

Tel3fono: 93 507 26 84. e-mail: [asicras@bsa.cat](mailto:asicras@bsa.cat)

## ABSTRACT

*Objectives:* To describe the adaptive capacity of the Adjusted Clinical Groups (ACG) system to the cost of care in primary healthcare (PHC) centers in Catalonia (Spain).

*Design:* Retrospective study (multicenters) conducted using computerized medical records

*Setting:* 13 primary care teams in 2008 were included.

*Participants:* All patients registered in the study centers who required care between January 1 and December 31, 2008 were finally studied. Patients not registered in the study centers during the study period were excluded.

*Outcome measures:* demographic (age and sex), dependent (cost of care) and case mix variables were studied. The cost model for each patient was established by differentiating the fixed and variable costs. To evaluate the adaptive capacity of the ACG system, Pearson's coefficient of variation (CV) and the percentage of outliers were calculated. Multiple linear regression analysis was used for predictive models.

*Results:* The number of patients studied was 227,235 (frequency: 5.9 visits per person per year), with a mean of 4.5 (3.2) episodes and 8.1 (8.2) visits per patient per year. The mean total cost was €654.2. The explanatory power of the ACG system was 36.9% for costs (56.9% without outliers). Ten ACG categories accounted for 60.1% of all cases and 19 for 80.9%. Five categories represented 71% of poor performance (N = 78,887, 34.7%), particularly category 0300 -Acute Minor, Age 6+ (N = 26,909; 11.8%), which had a CV = 139% and 6.6% of outliers.

*Conclusions:* The ACG system is suitable for the classification of PHC patients in Catalonia. Their adaptive capacity would be improved by desegregating some categories, especially in pediatric patients.

**Keywords:** Adjusted Clinical Groups. Poor performance. Use of resources. Primary care. Health care costs.

## ARTICLE SUMMARY

### *Article focus*

- In health management, separating financing, purchasing and the provision of services requires more precise instruments and measurement of healthcare activity.
- The Adjusted Clinical Groups (ACG) Case-Mix System is a system of risk adjustment that classifies persons according to the diseases they present over a given period.

### *Key messages*

- The ACG system is an appropriate manner of classifying patients in routine clinical practice in PHC centers in Catalonia.
- Although improvements to the adaptive capacity through disaggregation of some categories according to age groups and, especially, the number of acute episodes in pediatric patients, would be necessary to reduce intra-group variation.

### *Strengths and limitations of this study*

- The greatest limitations of the study are related to the quality of the records and information systems.
- Without standardization of methodologies in terms of patient characteristics and the number and measurement of variables, the results and their generalizability should be interpreted with caution.

## INTRODUCTION

In health management, separating financing, purchasing and the provision of services requires more precise instruments and measurement of healthcare activity<sup>1-2</sup>. Various countries are developing methods of per capita funding as a mechanism for allocating health care resources in a given region<sup>3</sup>. The Adjusted Clinical Groups (ACG) Case-Mix System is a system of risk adjustment that classifies persons according to the diseases they present over a given period. The main objective is to measure the degree of disease in patient populations according to different levels of morbidity<sup>4-5</sup>.

Classification systems for ambulatory patients, especially primary healthcare (PHC) patients, have not been widely used even in the USA, where they mainly originated. In addition, there is some uncertainty about the adaptive capacity of these instruments in health fields other than that for which they were designed. These classification systems relate the burden of disease, consumption of resources and the real costs of care<sup>6-11</sup>. Therefore, studies aimed at improving knowledge of the relationships between these factors can provide valuable evidence.

In general, ACG are accepted as useful in our setting and their use is increasing in various areas. However, some ACG categories seem to have excess variability and therefore we decided to study the performance of each ACG category in PHC centers in Catalonia<sup>6,12-13</sup>.

The aim of this study was to identify the retrospective adaptive capacity and poorly-performing categories of the ACG system according to the cost of care in various PHC centers in Catalonia (Spain) in daily clinical practice.

## METHODS

### *Design and study population*

We conducted a retrospective, multicenter study based on computerized medical records of PHC patients. All records were dissociated to ensure the confidentiality of the data. The study population consisted of all patients (N=310,235) assigned to thirteen PHC centers in Catalonia belonging to four service providers. The patient population was predominantly urban, lower-middle class, with industrial occupations. All centers included provide universal free-at-the-point-of care healthcare with private provision of services in concert with the Catalan Health Service. All patients registered in the study centers who required care between January 1 and December 31, 2008 were finally studied. Patients not registered in the study centers during the study period were excluded.

### *Data retrieval and processing*

Dependent variables were defined as the mean number of episodes and the direct costs of PHC. The independent variables analyzed were: age, sex, care provider and clinical service (family medicine [age  $\geq 15$  years] and pediatrics [age 0-14 years]). An episode or reason for consultation was considered as a care process equivalent to a diagnosis. The health problems diagnosed were coded using the International Classification for Primary Care (ICPC-2)<sup>14</sup>. A conversion (mapping) from ICPC-2 codes to ICD-9-CM was made by a working group (one documentalist, two clinicians and two technical consultants). Relationships between the ICPC-2 and ICD-9-CM were divided into three groups: 1) no relationship (ICPC-2 code with no equivalent in ICD-9-CM), 2) one-way relationship (one ICPC-2 code with a single equivalent in ICD-9-CM, the optimal situation) and 3) multiple relationships (one ICPC-2 code with several possible equivalents in ICD-9-CM).

The following measures were used to calculate overall morbidity: a) the Charlson comorbidity index<sup>15</sup> as an approximation of severity, and b) the individual case mix index, obtained using the ACG. The operating algorithm of the ACG Grouper version 8.2 (<http://www.acg.jhsph.edu>)<sup>16</sup> consists of a series of consecutive steps that result in 106 ACG, which are mutually-exclusive groups for each patient treated.

To construct an ACG, the age, sex and the reasons for consultation or diagnosis according to ICD-9-CM are required. The first stage groups the diagnoses of the ICD-9-CM in 32 Ambulatory Diagnostic Groups (ADG) (a patient may have one or more ADG), the second step groups the ADG into 12 Collapsed Ambulatory Diagnostic Groups (CADG), the third step transforms these into 25 Major Ambulatory Categories (MAC), and finally these are transformed into an ACG category. At the end of the process, each patient is assigned to a single group with similar resource consumption. The application provides resource utilization bands (RUB), with each patient being grouped into one of five mutually-exclusive categories according to their morbidity (1: healthy users, 2: low morbidity, 3: moderate morbidity, 4: high morbidity and 5: very high morbidity)<sup>4-5</sup>.

To measure the performance or adaptive capacity of each ACG category (intra-group variability of the total cost of care) we used: a) the Pearson coefficient of variation (CV), in which a coefficient greater than 100% was considered poor performance, b) the percentage of outliers obtained through data refining of variables. The cutoff point (T) for outliers was established using the formula:  $T=Q_3+1.5(Q_3-Q_1)$ , where  $Q_3$  and  $Q_1$  are the third and first quartile of the distribution, respectively.

### *Use of resources and cost model*

The design of the system of costs took into account the information requirements and degree of development of available information systems. The unit of care product used as the basis for the final calculation was the cost per patient treated during the study period. For each patient, we differentiated fixed costs and variable costs. The main fixed costs were: staff (salaries and wages), purchases (drugs, medical supplies, etc.), outsourced services (building repair and maintenance, professional services, etc.), and a set of costs relating to structural services and center management according to the General Accounting Plan for Health Care Centers. Fixed costs were allocated per visit (mean/unit: fixed costs/total number of visits). Variable costs per patient were calculated according to diagnostic petitions (laboratory, radiology, diagnostic or therapeutic, referrals to specialists and drug prescriptions). The tariffs used to calculate costs came from analytical cost-accounting studies (see Table 1). Finally, the cost per patient was calculated as:  $C_p = (\text{mean cost per visit} \times \text{number of visits} [\text{fixed costs}]) + (\text{variable costs})$ .

### *Data confidentiality*

The confidentiality of records according to the Organic Law on Data Protection (15/1999, December 13) was respected by dissociating the data.

### *Data quality and statistical analysis*

In a preliminary analysis we carefully reviewed the medical records to observe their frequency and distribution and to search for possible errors in recording or coding.

We performed a descriptive univariate analysis including mean values, standard deviation (SD), proportions and percentiles. The normal distribution of variables was confirmed using the Kolmogorov-Smirnov test. In the bivariate analysis, we used the chi-square test, the Student t test, ANOVA, Pearson's linear correlation and the Mann-Whitney Wilcoxon nonparametric test. To evaluate the explanatory power of the ACG System we used the coefficient of determination ( $R^2$ ) obtained from the ratio intra-group variability/ total variability (ANOVA). Multiple linear regression analysis (method: stepwise, dependent variable: total cost) was used to determine the variables that best explained the cost of PHC. The analysis was made using the SPSS for Windows v. 18 statistical package. Statistical significance was established as  $p < 0.05$ .

## RESULTS

A total of 227,235 patients were registered in the study centers in 2008 (86.5% in family medicine and 13.5% in pediatrics). Table 2 details the general characteristics of the patient population, the co-morbidity and the total costs. Patients had a mean of 4.5 (3.2) episodes and 8.1 (8.2) visits per year. The percentage of males (51.1% vs. 43.3%,  $p < 0.001$ ) and visits (9.7 versus 7.8  $p < 0.001$ ) were higher in pediatric patients. The mean age of women was higher than that of men, 39.2 versus 37.8 ( $p < 0.001$ ). The total cost was 148.7 million euros (93.3% for family medicine). Drugs were prescribed to 80.1% of patients. Fixed costs accounted for 29.1% of total costs and variable costs for 70.9% (including 47.5% on drug prescriptions). Therefore, the mean total cost per patient per year was € 654.2 (851.7), € 702.5 in Family Medicine and Pediatric € 344.6,  $p < 0.001$ . A total of 6.2% of patients were considered outliers, and after data refining the mean unitary cost per year was € 556.7.

In the regression model (Table 3,  $N=227,235$ ), the cost of drugs and episodes explained 94% of total costs. The results of the model using cleansed data ( $N = 213,169$ ) were similar, although there was a greater beta coefficient for the episodes in comparison with the ADG (75.139 versus 10.023) although this did not modify the percentages of the coefficient of determination (0.917 versus 0.918). The association between the mean/unit cost according to age is shown in Figure 1.

The performance (patient distribution) and adaptive capacity (intra-group variation in categories) of the ACG classification are shown in Table 4. All patients were grouped in a category. However, no patients were grouped in 37 of the 106 categories, meaning that all patients were grouped in the remaining 69 categories. Furthermore, 61% of all patients were grouped in 10 categories and 80.9% in 19 ( $N = 183,721$ , Table 4). This distribution showed no significant differences according to the service provider. In 10 ACG categories, a poor performance (poor adaptive capacity) was observed ( $CV > 100\%$ ,  $N = 110,917$ , 48.8% of patients, Table 4 and Figure 2). The two categories with the highest CV were 1600-Preventive/Administrative ( $N = 8,527$ , 3.8%, outliers: 12.5%) and 1300-Psychosocial, w/o Psychosocial Unstable ( $N = 3,653$ , 1.6%, outliers: 10.7%).

We carried out a more-detailed analysis according to poor performance and the number of patients in each category. Table 5 shows the distribution of five ACG categories (making up 71% of poorly-performing categories,  $N = 78,887$ ). Compared with the total of 69 categories ( $N = 227,235$ ) these five categories had a lower explanatory power (coefficient of determination,  $R^2$ ) in episodes (44.3% versus 77.4%) and total costs (18.8% versus 36.9%),  $p < 0.001$ . For refined data, the results were 46.4% versus 78.4% for episodes and 36.5% versus 56.9% for total costs,  $p < 0.001$ . Category 0300-Acute Minor, Age 6 + ( $N = 26,909$ ; 11.8%) had a  $CV = 139\%$  and 6.6% of outliers and showed



1  
2  
3  
4  
5  
6  
7  
8  
9  
10  
11  
12  
13  
14  
15  
16  
17  
18  
19  
20  
21  
22  
23  
24  
25  
26  
27  
28  
29  
30  
31  
32  
33  
34  
35  
36  
37  
38  
39  
40  
41  
42  
43  
44  
45  
46  
47  
48  
49  
50  
51  
52  
53  
54  
55  
56  
57  
58  
59  
60

significant differences before and after data refining. Categories 0400-Acute Major (N = 8160) and 1800-Acute Minor/Acute Major (N = 9077) performed similarly. Category 4100-2-3 Other ADG Combinations, Age 35 +, had the highest number of patients (N = 28,864, 12.7%), with a high mean number of episodes (3.9 of total cases, compared to 4.5 in outliers,  $p < 0.001$ ), resulting in increased costs in these patients. The  $R^2$  of the five poorly-performing categories was 34.7%.

## DISCUSSION

This study determined the retrospective adaptive capacity of the ACG classification system according to the cost of PHC in Catalonia (Spain) in daily clinical practice, identifying 10 categories that performed poorly in the Catalan health system. In Catalonia, the use of capitation-based funding is still in its infancy compared to other European healthcare systems. The focus is on incorporating risk adjustment indicators in order to provide unbiased estimates of the expected costs of an individual patient in each health plan<sup>2-17</sup>.

There is abundant published evidence on the use and overall performance of the ACG classification, but evidence on categories that perform poorly is very limited<sup>4-7,9,12,18-23</sup>. It is expected that persons with similar morbidity and demographic characteristics will have a similar use of resources. In this respect, the available empirical evidence shows that it is technically possible to find an adjustment formula to predict at least a portion of the variation in health expenditure per person, and also that the highest predictive values are achieved by systems that incorporate diagnostic information<sup>6,21,25</sup>. This has been proven in our study, since the number of episodes showed a greater explanatory power with respect to ACG categories than the total costs. Furthermore, data refining may lessen the weight of random factors in predicting expenditure, although it is known that no system of classification of patients into RUB explains all the variation in the use of resources<sup>6-7,10,26</sup>.

In general, the Grouper requires a limited number of variables for each patient: age, sex and diagnosis (not necessarily correlated in time). This simplicity of use is compatible with the needs of PHC, which must work with large daily volumes of information, limited time for each patient, professional cooperation (doctors, nurses, social workers, etc.) and repeated visits from the same patient. However, a greater degree of computerization of PHC and the establishment of mechanisms for consensus between health professionals would be required to increase data quality and the consistency of records, especially in the identification of diagnoses<sup>11,23</sup>.

1  
2  
3 The general results of the study (demographic variables [age and sex], case mix [morbidity] and  
4 resource use levels [RUB]), fall within the parameters expected in PHC in Spain. Furthermore, the  
5 distribution of patients within ACG categories is similar to the results obtained in other studies (60% of  
6 patients are grouped in 10 ACG categories), and stable over time<sup>4,6,8-9,12,18-23,25-28</sup>. In the different  
7 regression models analyzed, the number of episodes had a greater explanatory power than the ADG  
8 (dependent variable: cost of care), although there was a high correlation between the two variables  
9 (Tables 3 and 4).  
10  
11  
12  
13

14  
15 This may be because the grouping works by binary combinations of ADG, regardless of the number  
16 of recurrences and the type of disorder<sup>4,5</sup>. For example, a patient with one or more episodes of upper  
17 respiratory tract infection over time, with or without concomitant pharyngitis, may remain grouped in  
18 the same ACG category, resulting in widely-differing use of resources and degree of variation in  
19 costs. This point has been suggested by some authors as a limitation of the ACG system, although  
20 recent years have seen an expansion of categories from 51 to 103 to avoid such problems<sup>23</sup>.  
21  
22  
23  
24  
25

26  
27 Poor performance or adaptive capacity was observed in 10 ACG categories (N = 110,917, 48.8% of  
28 patients). The two categories with the highest CV were: Preventive/Administrative and Psychosocial,  
29 w/o Psychosocial Unstable. These results are difficult to compare for several reasons: a) These  
30 categories include many different circumstances and conditions (administrative processes, preventive  
31 actions and health promotion, unstable conditions with an unpredictable risk of recurrence, etc.), b)  
32 These conditions tend to be associated with poor-quality medical records (prescriptions not linked to  
33 a diagnosis, etc.), and c) The presence of different organizational models between centers (patient  
34 circuits, etc.) as a result of health policies, causing a high degree of variability that affects the use of  
35 resources and their costs.  
36  
37  
38  
39  
40  
41  
42

43 We found that five categories accounted for 71% of poor performance. In general, acute disease  
44 (0300-Acute Minor, Age 6 +, 0400-Acute Major and 1800-Acute Minor/Acute Major), representing a  
45 large number of pediatric patients, had a poor adaptive capacity. The ACG classification in Catalonia  
46 might be improved by expanding some of these categories according to age groups and, especially,  
47 by quantifying the number of episodes occurring during the study period. However, in the categories  
48 4100-2-3 Other ADG Combinations, Age 35 + and 3900-2-3 Other ADG Combinations, Males Age 18  
49 to 34, the performance with respect to classification into RUB could be improved by separating  
50 different ranges of episodes or ADG.  
51  
52  
53  
54  
55  
56  
57  
58  
59  
60

1  
2  
3 Therefore, a possible scenario for the debate on the funding model for PHC teams could be  
4 developed using a combination of factors: a) the weighting of structural costs related to accessibility,  
5 b) the variable costs according to the case-mix (ACG) and patient complexity, adapting the  
6 classification to the country, and c) quality targets derived from the policy sought by the purchaser  
7 and expected by the customer. In this aspect, the adaptive capacity of the ACG system to the Catalan  
8 setting could be bettered by improving the definition of some categories. This would facilitate policy  
9 making using benchmarking with respect to the complexity (case mix) and efficiency of PHC centers  
10 with the population served, enabling capitation payments (risk adjustment)<sup>4,26</sup>.

11  
12  
13  
14  
15  
16  
17 The greatest limitations of the study are related to the quality of the records and information systems.  
18 Without standardization of methodologies in terms of patient characteristics and the number and  
19 measurement of variables, the results and their generalizability should be interpreted with caution<sup>24</sup>.  
20 In addition, possible differences between health professionals in the selection of diagnoses may  
21 contaminate the comparison of costs between groups. However, strength of the study is that the large  
22 sample size could minimize these drawbacks. The ACG system was designed to measure the health  
23 status and medical resources consumed in a set of patients and, therefore, population-based studies  
24 of risk-adjusted capitation payments and the clinical management of PHC centers may be of  
25 considerable interest in Catalonia<sup>23, 29</sup>.

## 35 CONCLUSIONS

36  
37 The ACG system is an appropriate manner of classifying patients in routine clinical practice in PHC  
38 centers in Catalonia, although improvements to the adaptive capacity through disaggregation of some  
39 categories according to age groups and, especially, the number of acute episodes in pediatric  
40 patients, would be necessary to reduce intra-group variation.

41  
42  
43  
44  
45 **Funding:** This work was supported by Fondo de Investigaciones Sanitarias de la Seguridad Social (Instituto  
46 Carlos III, Majahonda, Madrid, Spain), grant number PI 08/1567.

47  
48 **Competing interests:** None.

49  
50 **Ethics approval:** The study project was approved by the Ethics and Clinical Research Committee of the Jordi  
51 Gol Clinical Research Institute (IDIAP Jordi Gol).

52  
53 **Contributors:** AS, SV, RN, CV, AP and MV planned the study. AS, RN and SV supervised the campaign  
54 registration, data entry and follow-up. AS was responsible for the statistical analysis with help from SV. AS  
55 wrote the first draft of the paper and has the primary responsibility for the final content. All authors contributed to  
56 and approved the final manuscript. AS is the head of the Catalan study.

57  
58 **Provenance and peer review:** Not commissioned; externally peer reviewed.

**REFERENCES**

1. Rice N, Smith P. Capitation and risk adjustment in health care financing: an international progress report. *The Milbank Quarterly*. 2001;79:81-113.
2. Forrest CB, Lemke KW, Bodycombe DP, Weiner JP. Medication, diagnostic, and cost information as predictors of high-risk patients in need of care management. *Am J Manag Care*. 2009;15:41-48.
3. Rico A, Saltman RB, Boerma WGW. Organizational restructuring in European health care systems: the role of primary care. *Social Policy Admin*. 2003;37:592-608.
4. Weiner JP, Starfield BH, Steinwachs DM, Mumford LM. Development and application of a population-oriented measure of ambulatory care case-mix. *Med Care*. 1991;29:452-72.
5. Starfield B, Lemke KW, Bernhardt T, Foldes SS, Forrest CB, Weiner JP. Comorbidity: implications for the importance of primary care in 'case' management. *Ann Fam Med*. 2003;1:8-14.
6. Sicras-Mainar A, Serrat-Tarres J. Measurement of relative cost weights as an effect of the retrospective application of adjusted clinical groups in primary care. *Gac Sanit*. 2006;20:132-41.
7. Petersen LA, Pietz K, Woodard LD, Byrne M. Comparison of the predictive validity of diagnosis-based risk adjusters for clinical outcomes. *Med Care*. 2005;43:61-7.
8. Hughes JS, Averill RF, Eisenhandler J, Goldfield NI, Muldoon J, Neff JM, Gay JC. Clinical Risk Groups (CRGs): a classification system for risk adjusted capitation-based payment and health care management. *Med Care*. 2004;42:81-90.
9. Meenan RT, Goodman MJ, Fishman PA, Hornbrook MC, O'Keeffe-Rosetti MC, Bachman DJ. Using risk-adjustment models to identify high-cost risks. *Med Care*. 2003;41:1301-12.
10. Buglioli M, Bonilla M, Ortún Rubio V. Sistemas de ajuste por riesgo. *Rev Med Uruguay*. 2000;16:123-32
11. Fusté J, Bolívar B, Castillo A, Coderch J, Ruano I, Sicras A. Hacia la definición de un conjunto mínimo básico de datos de atención primaria. *Aten Primaria*. 2002;30:229-235.
12. Aguado A, Guino E, Mukherjee B, Sicras A, Serrat J, Acedo M, Ferro JJ, Moreno V. Variability in prescription drug expenditures explained by adjusted clinical groups (ACG) case-mix: a cross-sectional study of patient electronic records in primary care. *BMC Health Serv Res*. 2008;8:53.
13. Sicras-Mainar A, Serrat-Tarrés J, Navarro-Artieda R, Llausí-Sellés R, Ruano-Ruano I, González-Ares JA. Adjusted Clinical Groups use as a measure of the referrals efficiency from primary care to specialized in Spain. *Eur J Public Health*. 2007;17:657-63.
14. Lamberts H, Wood M, Hofmans-Okkes IM (eds). *The International Classification of Primary Care in the European Community. With a multi-language layer*. Oxford: Oxford University Press, 1993.
15. Charlson ME, Pompei P, Ales KL, Mackenzie CR. A new method of classifying prognostic comorbidity in longitudinal studies: development and validation. *J Chronic Dis*. 1987;40:373-383.
16. The Johns Hopkins ACG<sup>®</sup> Case-mix System version 8.2. Johns Hopkins Bloomberg School of Public Health. Baltimore, 2008.

- 1  
2  
3  
4 17. Vargas I. La utilización del mecanismo de asignación per cápita: la experiencia de Cataluña. Cuadernos de Gestión 2002;8:167-78.
- 5  
6  
7 18. Fishman PA, Goodman MJ, Hornbrook MC, Meenan RT, Bachman DJ, O'Keeffe Rosetti MC. Risk  
8 adjustment using automated ambulatory pharmacy data: the RxRisk model. Med Care. 2003;41:84-  
9 99.
- 10  
11 19. Rosen AK, Loveland SA, Rakovski CC, Christiansen CL, Berlowitz DR. Do different case-mix  
12 measures affect assessments of provider efficiency? Lessons from the Department of Veterans  
13 Affairs. J Ambul Care Manage. 2003;26:229-42.
- 14  
15 20. Shen Y, Ellis RP. How profitable is risk selection? A comparison of four risk adjustment models.  
16 Health Econ. 2002;11:165-74.
- 17  
18 21. Carlsson L, Strender LE, Fridh G, Nilsson G. Types of morbidity and categories of patients in a  
19 Swedish county. Applying the Johns Hopkins Adjusted Clinical Groups System to encounter data in  
20 primary health care. Scand J Prim Health Care. 2004;22:174-9.
- 21  
22 22. Reid RJ, MacWilliam L, Verhulst L, Roos N, Atkinson M. Performance of ACG case-mix system in  
23 two Canadian provinces. Med Care. 2001;39:86-99.
- 24  
25 23. Chang HY, Weiner J. An in-depth assessment of a diagnosis-based risk adjustment model based  
26 on national health insurance claims: the application of the Johns Hopkins Adjusted Clinical Group  
27 case-mix system in Taiwan. BMC Medicine. 2010;8:7.
- 28  
29 24. Sackett D, Rosenberg W, Gray J, Haynes R, Richardson W. Evidence based medicine: what it is  
30 and what it isn't. BMJ. 1996;312:71-72.
- 31  
32 25. Orueta JF, Urraca J, Berraondo I, Darpon J, Aurrekoetxea JJ. Adjusted Clinical Groups (ACGs)  
33 explain the utilization of primary care in Spain based on information registered in the medical records:  
34 a cross-sectional study. Health Policy. 2006;76:38-48.
- 35  
36 26. Greenwald LM. Medicare risk-adjusted capitation payments: from research to implementation.  
37 Health Care Financ Rev. 2000;21:1-5.
- 38  
39 27. Reid RJ, Roos NP, MacWilliam L, Frohlich N, Black C: Assessing population health care need  
40 using a claims-based ACG morbidity measure: A validation analysis in the Province of Manitoba.  
41 Health Serv Res. 2002;37:1345-64.
- 42  
43 28. Kuo R, Lai MS. Comparison of Rx-defined morbidity groups and diagnosis based risk adjusters  
44 for predicting healthcare costs in Taiwan. BMC Health Serv Res. 2010;10:126.
- 45  
46 29. Gosden T, Forland F, Kristiansen IS, Sutton M, Leese B, Giuffrida A, Sergison M, Pedersen L.  
47 Capitation, salary, fee-for-service and mixed systems of payment: effects on the behaviour of primary  
48 care physicians. Cochrane Database Syst Rev. 2000;(3):CD002215.
- 49  
50  
51  
52  
53  
54  
55  
56  
57  
58  
59  
60

1  
2  
3  
4  
5  
6  
7  
8  
9  
10  
11  
12  
13  
14  
15  
16  
17  
18  
19  
20  
21  
22  
23  
24  
25  
26  
27  
28  
29  
30  
31  
32  
33  
34  
35  
36  
37  
38  
39  
40  
41  
42  
43  
44  
45  
46  
47  
48  
49  
50  
51  
52  
53  
54  
55  
56  
57  
58  
59  
60

Table 1: Mean unit costs in 2008

| Health resources                 | Unit cost (€) |
|----------------------------------|---------------|
| Health visit                     | 23.62         |
| Laboratory tests                 | 22.70         |
| Conventional radiology           | 18.84         |
| Diagnostic tests/therapy         | 37.85         |
| Referral to reference specialist | 106.29        |
| Drug prescriptions               | RRPvat        |

Source: analytical accounting conducted for this study, RRPvat: recommended retail price including Value Added Tax.

For peer review only

Table 2: General characteristics of study: co-morbidity and cost model

| Characteristics                         | Total         |        |
|-----------------------------------------|---------------|--------|
| Patients                                | N = 227,235   |        |
| <i>General</i>                          |               |        |
| Number of physicians                    | 224           |        |
| Number of episodes                      | 1,020,606     |        |
| Number of visits                        | 1,834,326     |        |
| Mean age, years                         | 44.1 (23.7)   |        |
| - 25 Percentile                         | 27.0          |        |
| - 50 Percentile                         | 43.0          |        |
| - 75 Percentile                         | 67.0          |        |
| Sex (female)                            | 55.6%         |        |
| <i>General co-morbidity</i>             |               |        |
| Mean ADG                                | 3.7 (2.2)     |        |
| - 25 Percentile                         | 2.0           |        |
| - 50 Percentile                         | 3.0           |        |
| - 75 Percentile                         | 5.0           |        |
| Mean episodes                           | 4.5 (3.2)     |        |
| Mean Charlson index                     | 0.2 (0.6)     |        |
| RUB                                     | 2.4 (0.8)     |        |
| 1                                       | 16.9%         |        |
| 2                                       | 31.0%         |        |
| 3                                       | 47.9%         |        |
| 4                                       | 3.8           |        |
| 5                                       | 0.5           |        |
| Outliers (N = 14,066)                   | 6.2%          |        |
| <i>Cost model (in euros) per year</i>   |               |        |
|                                         | Mean/unit     | %      |
| - Fixed costs                           | 190.7 (193.3) | 29.1%  |
| - Laboratory                            | 51.9 (73.8)   | 7.9%   |
| - Conventional radiology                | 21.4 (34.1)   | 3.3    |
| - Complementary tests                   | 6.2 (19.6)    | 1.0%   |
| - Referrals to specialists              | 73.1 (117.3)  | 11.2%  |
| - Drug prescriptions                    | 310.8 (681.2) | 47.5%  |
| Total cost of PHC                       | 654.2 (851.7) | 100.0% |
| - Cost of family medicine               | 92.9%         |        |
| - Cost of pediatric medicine(0-14years) | 7.1.          |        |

Values expressed as mean (SD: standard deviation) or percentage; RUB: resource utilization bands, ADG: Ambulatory Diagnostic Groups, PHC: Primary Health Care.

1  
2  
3  
4  
5  
6  
7  
8  
9  
10  
11  
12  
13  
14  
15  
16  
17  
18  
19  
20  
21  
22  
23  
24  
25  
26  
27  
28  
29  
30  
31  
32  
33  
34  
35  
36  
37  
38  
39  
40  
41  
42  
43  
44  
45  
46  
47  
48  
49

Table 3: Final result of multiple linear regression model.

| Final model                              | Beta    | 95% CI  |         | R <sup>2</sup> | t        | p      | Collinearity statistics |        |
|------------------------------------------|---------|---------|---------|----------------|----------|--------|-------------------------|--------|
|                                          |         | Li      | Ls      |                |          |        | Tolerance               | Factor |
| <i>Without data refining, N = 227235</i> |         |         |         |                |          |        |                         |        |
| Pharmacy cost                            | 1.000   | 0.998   | 1.002   | 0.879          | 1204.095 | <0.001 | 0.539                   | 1.856  |
| Episodes                                 | 80.878  | 79.290  | 82.466  | 0.944          | 99.810   | <0.001 | 0.025                   | 40.051 |
| RUB                                      | 22.631  | 21.263  | 23.999  | 0.946          | 32.426   | <0.001 | 0.512                   | 1.953  |
| Age                                      | 0.393   | 0.352   | 0.433   | 0.946          | 18.997   | <0.001 | 0.715                   | 1.399  |
| ADG                                      | -12.146 | -13.904 | -10.388 | 0.946          | -13.540  | <0.001 | 0.024                   | 41.647 |
| Sex                                      | -8.402  | -10.064 | -6.741  | 0.946          | -9.912   | <0.001 | 0.972                   | 1.029  |
| <i>With data refining, N = 213169</i>    |         |         |         |                |          |        |                         |        |
| Pharmacy cost                            | 1.031   | 1.029   | 1.033   | 0.826          | 893.708  | <0.001 | 0.584                   | 1.713  |
| Episodes                                 | 75.139  | 73.566  | 76.712  | 0.917          | 93.624   | <0.001 | 0.024                   | 42.008 |
| RUB                                      | 21.727  | 20.413  | 23.041  | 0.918          | 32.410   | <0.001 | 0.512                   | 1.954  |
| Age                                      | 0.387   | 0.346   | 0.428   | 0.918          | 18.613   | <0.001 | 0.667                   | 1.500  |
| ADG                                      | -10.023 | -11.755 | -8.291  | 0.918          | -11.340  | <0.001 | 0.023                   | 43.539 |
| Sex                                      | -7.367  | -8.960  | -5.773  | 0.918          | -9.062   | <0.001 | 0.973                   | 1.028  |

Dependent variable: total cost, input method: stepwise, CI: confidence intervals; Li: lower limit; Ls: upper limit; p: statistical significance, t: Student test; R<sup>2</sup>: coefficient of determination; RUB: resource utilization bands, ADG: Ambulatory Diagnostic Groups. The cutoff (T) for data refining of outliers was established using the formula:  $T = Q_3 + 1.5(Q_3 - Q_1)$  where  $Q_3$  and  $Q_1$  are the third and first quartiles of the distribution, respectively.



Table 4: Distribution of ACG categories with the most patients: variability of categories

| ACG  | ACG Description                                                 | N     | %     | Cost <sup>(1)</sup> | CV   | Outliers <sup>(2)</sup> |
|------|-----------------------------------------------------------------|-------|-------|---------------------|------|-------------------------|
| 4100 | 2-3 Other ADG Combinations, Age 35+                             | 28864 | 12.7% | 776.3               | 107% | 6.5%                    |
| 0300 | Acute Minor, Age 6+                                             | 26909 | 11.8% | 169.6               | 139% | 6.6%                    |
| 4910 | 6-9 Other ADG Combinations, Age 35+, 0-1 Major ADGs             | 14876 | 6.5%  | 1,624.4             | 67%  | 4.5%                    |
| 2100 | Acute Minor/Likely to Recur, Age 6+, w/o Allergy                | 11867 | 5.2%  | 304.7               | 91%  | 5.3%                    |
| 4410 | 4-5 Other ADG Combinations, Age 45+, no Major ADGs              | 10551 | 4.6%  | 1,025.4             | 74%  | 5.3%                    |
| 4420 | 4-5 Other ADG Combinations, Age 45+, 1 Major ADGs               | 10137 | 4.5%  | 1,336.2             | 79%  | 4.6%                    |
| 0500 | Likely to Recur, w/o Allergies                                  | 9872  | 4.3%  | 187.2               | 140% | 6.6%                    |
| 1800 | Acute Minor/Acute Major                                         | 9077  | 4.0%  | 353.2               | 104% | 5.9%                    |
| 1600 | Preventive/Administrative                                       | 8527  | 3.8%  | 229.5               | 215% | 12.5%                   |
| 0400 | Acute Major                                                     | 8160  | 3.6%  | 237.3               | 160% | 8.1%                    |
| 0900 | Chronic Medical: Stable                                         | 6319  | 2.8%  | 506.7               | 114% | 6.2%                    |
| 3900 | 2-3 Other ADG Combinations, Males Age 18 to 34                  | 5877  | 2.6%  | 341.7               | 117% | 6.0%                    |
| 3200 | Acute Minor/Acute Major/Likely to Recur, Age 12+, w/o Allergy   | 5785  | 2.5%  | 525.0               | 89%  | 6.3%                    |
| 2300 | Acute Minor/Chronic Medical: Stable                             | 5756  | 2.5%  | 612.6               | 95%  | 6.3%                    |
| 3600 | Acute Minor/Acute Major/Likely to Recur/Chronic Medical: Stable | 5575  | 2.5%  | 1,022.1             | 72%  | 5.0%                    |
| 4310 | 4-5 Other ADG Combinations, Age 18 to 44, no Major ADGs         | 4168  | 1.8%  | 554.8               | 86%  | 6.4%                    |
| 4920 | 6-9 Other ADG Combinations, Age 35+, 2 Major ADGs               | 4089  | 1.8%  | 2,102.5             | 67%  | 3.5%                    |
| 2800 | Acute Major/Likely to Recur                                     | 3659  | 1.6%  | 351.0               | 102% | 6.9%                    |
| 1300 | Psychosocial, w/o Psychosocial Unstable                         | 3653  | 1.6%  | 340.4               | 175% | 10.7%                   |

Nineteen ACG categories contain 80.9% of patients (N = 183,721). No patient was grouped in 37 ACG categories; ACG, Adjusted Clinical Groups (Code)<sup>(1)</sup>: Gross cost (mean/unit in euros), CV: Pearson's Coefficient of Variation,<sup>(2)</sup>:outliers: percentage of patients, cut-off:  $T = Q_3 + 1.5(Q_3 - Q_1)$  where  $Q_3$  and  $Q_1$  are the third and first quartiles of the distribution, respectively. Total sample: N = 227235, CV = 130.0%, outliers: 6.2%.

Table 5: Distribution of five poorly-performing ACG categories according to age, episodes and cost

| ACG categories (coding and description)                     | Total | No outliers   | Outliers |               |      |                 |
|-------------------------------------------------------------|-------|---------------|----------|---------------|------|-----------------|
| Variables                                                   | N     | Mean          | N        | Mean          | N    | Mean            |
| <i>4100: 2-3 Other ADG Combinations, Age 35+</i>            | 28864 |               | 26992    |               | 1872 |                 |
| Age                                                         |       | 60.5 (14.8)   |          | 59.7 (14.6)   |      | 70.9 (12.8)     |
| Episodes                                                    |       | 3.9 (1.3)     |          | 3.9 (1.2)     |      | 4.5 (1.5)       |
| Total cost                                                  |       | 776.3 (828.2) |          | 620.3 (448.7) |      | 3026.1 (1504.4) |
| <i>0300: Acute Minor, Age 6+</i>                            | 26909 |               | 25142    |               | 1767 |                 |
| Age                                                         |       | 33.1 (16.5)   |          | 31.9 (15.4)   |      | 50.5 (22.1)     |
| Episodes                                                    |       | 1.7 (1.1)     |          | 1.7 (0.9)     |      | 2.5 (1.4)       |
| Total cost                                                  |       | 169.5 (236.5) |          | 125.2 (91.7)  |      | 800.0 (554.3)   |
| <i>1800: Acute Minor/Acute Major</i>                        | 9077  |               | 8538     |               | 539  |                 |
| Age                                                         |       | 32.1 (19.8)   |          | 30.8 (18.5)   |      | 51.6 (27.1)     |
| Episodes                                                    |       | 3.6 (1.5)     |          | 3.6 (1.4)     |      | 4.8 (2.3)       |
| Total cost                                                  |       | 353.2 (366.2) |          | 288.7 (166.5) |      | 1374.2 (843.8)  |
| <i>0400: Acute Major</i>                                    | 8160  |               | 7503     |               | 657  |                 |
| Age                                                         |       | 38.5 (18.2)   |          | 36.6 (16.7)   |      | 59.9 (20.6)     |
| Episodes                                                    |       | 1.6 (0.8)     |          | 1.5 (0.7)     |      | 2.1 (1.1)       |
| Total cost                                                  |       | 237.3 (379.5) |          | 158.3 (108.7) |      | 1139.1 (877.8)  |
| <i>3900: 2-3 Other ADG Combinations, Males Age 18 to 34</i> | 5877  |               | 5523     |               | 354  |                 |
| Age                                                         |       | 28.1 (4.5)    |          | 28.0 (4.5)    |      | 28.7 (4.2)      |
| Episodes                                                    |       | 3.3 (1.0)     |          | 3.3 (1.1)     |      | 3.8 (1.2)       |
| Total cost                                                  |       | 341.6 (399.1) |          | 273.7 (154.1) |      | 1401.2 (1040.1) |

Contrast statistic: Chi<sup>2</sup> test or Mann-Whitney Wilcoxon test; p<0.001 in all cases, ADG: Ambulatory Diagnostic Groups; coefficient of determination (R<sup>2</sup>): intra-group/total variability (ANOVA).

Figure 1: Correlation of the cost of care according to age.

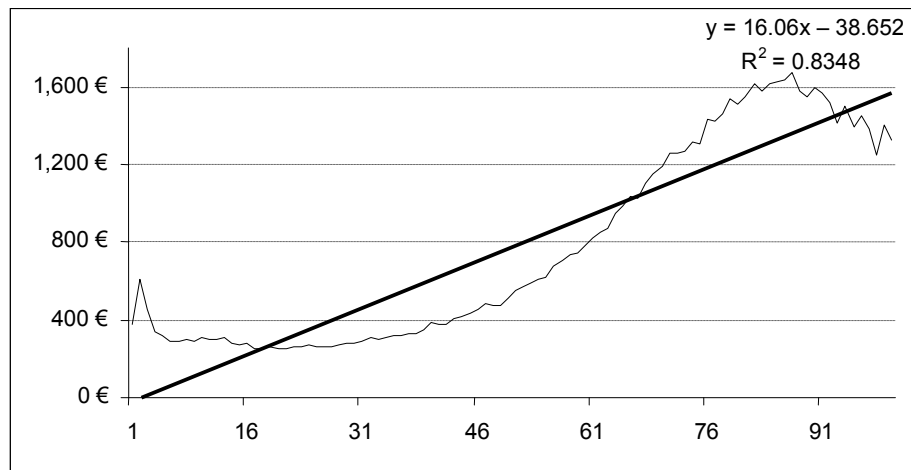

R<sup>2</sup>: Coefficient of determination; model adjusted by linear regression

peer review only

1  
2  
3  
4  
5  
6  
7  
8  
9  
10  
11  
12  
13  
14  
15  
16  
17  
18  
19  
20  
21  
22  
23  
24  
25  
26  
27  
28  
29  
30  
31  
32  
33  
34  
35  
36  
37  
38  
39  
40  
41  
42  
43  
44  
45  
46  
47  
48  
49  
50  
51  
52  
53  
54  
55  
56  
57  
58  
59  
60

Figure 2: Percentage distribution of coefficients of variation according to the number of categories, patients and outliers

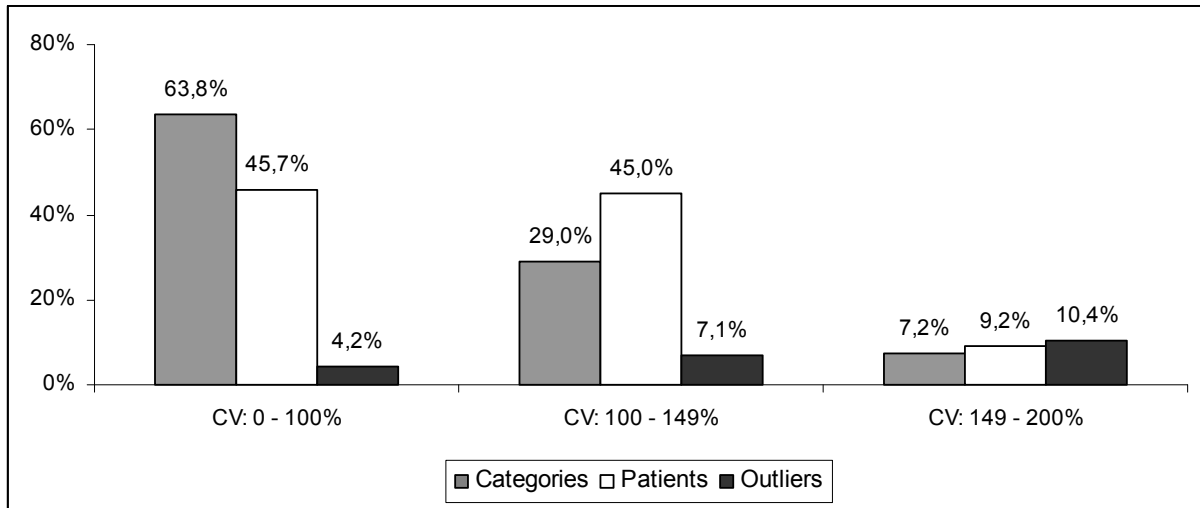

CV: Pearson's coefficient of variation; contrast statistic:  $\chi^2$ ,  $p < 0.001$  for all categories.

Peer review only

**STROBE 2007 (v4) checklist of items to be included in reports of observational studies in epidemiology\***  
**Checklist for cohort, case-control, and cross-sectional studies (combined)**

| Section/Topic             | Item # | Recommendation                                                                                                                                                                                                                                                                                                                                                                                                                                                         | Reported on page # |
|---------------------------|--------|------------------------------------------------------------------------------------------------------------------------------------------------------------------------------------------------------------------------------------------------------------------------------------------------------------------------------------------------------------------------------------------------------------------------------------------------------------------------|--------------------|
| Title and abstract        | 1      | (a) Indicate the study's design with a commonly used term in the title or the abstract                                                                                                                                                                                                                                                                                                                                                                                 | X                  |
|                           |        | (b) Provide in the abstract an informative and balanced summary of what was done and what was found                                                                                                                                                                                                                                                                                                                                                                    | X                  |
| <b>Introduction</b>       |        |                                                                                                                                                                                                                                                                                                                                                                                                                                                                        |                    |
| Background/rationale      | 2      | Explain the scientific background and rationale for the investigation being reported                                                                                                                                                                                                                                                                                                                                                                                   | X                  |
| Objectives                | 3      | State specific objectives, including any pre-specified hypotheses                                                                                                                                                                                                                                                                                                                                                                                                      | X                  |
| <b>Methods</b>            |        |                                                                                                                                                                                                                                                                                                                                                                                                                                                                        |                    |
| Study design              | 4      | Present key elements of study design early in the paper                                                                                                                                                                                                                                                                                                                                                                                                                | X                  |
| Setting                   | 5      | Describe the setting, locations, and relevant dates, including periods of recruitment, exposure, follow-up, and data collection                                                                                                                                                                                                                                                                                                                                        | X                  |
| Participants              | 6      | (a) <i>Cohort study</i> —Give the eligibility criteria, and the sources and methods of selection of participants. Describe methods of follow-up<br><i>Case-control study</i> —Give the eligibility criteria, and the sources and methods of case ascertainment and control selection. Give the rationale for the choice of cases and controls<br><i>Cross-sectional study</i> —Give the eligibility criteria, and the sources and methods of selection of participants | X                  |
|                           |        | (b) <i>Cohort study</i> —For matched studies, give matching criteria and number of exposed and unexposed<br><i>Case-control study</i> —For matched studies, give matching criteria and the number of controls per case                                                                                                                                                                                                                                                 |                    |
| Variables                 | 7      | Clearly define all outcomes, exposures, predictors, potential confounders, and effect modifiers. Give diagnostic criteria, if applicable                                                                                                                                                                                                                                                                                                                               | X                  |
| Data sources/ measurement | 8*     | For each variable of interest, give sources of data and details of methods of assessment (measurement). Describe comparability of assessment methods if there is more than one group                                                                                                                                                                                                                                                                                   | X                  |
| Bias                      | 9      | Describe any efforts to address potential sources of bias                                                                                                                                                                                                                                                                                                                                                                                                              | X                  |
| Study size                | 10     | Explain how the study size was arrived at                                                                                                                                                                                                                                                                                                                                                                                                                              | NA                 |
| Quantitative variables    | 11     | Explain how quantitative variables were handled in the analyses. If applicable, describe which groupings were chosen and why                                                                                                                                                                                                                                                                                                                                           | X                  |
| Statistical methods       | 12     | (a) Describe all statistical methods, including those used to control for confounding                                                                                                                                                                                                                                                                                                                                                                                  | X                  |
|                           |        | (b) Describe any methods used to examine subgroups and interactions                                                                                                                                                                                                                                                                                                                                                                                                    | NA                 |
|                           |        | (c) Explain how missing data were addressed                                                                                                                                                                                                                                                                                                                                                                                                                            | X                  |
|                           |        | (d) <i>Cohort study</i> —If applicable, explain how loss to follow-up was addressed<br><i>Case-control study</i> —If applicable, explain how matching of cases and controls was addressed                                                                                                                                                                                                                                                                              | X                  |

|                          |     |                                                                                                                                                                                                              |    |
|--------------------------|-----|--------------------------------------------------------------------------------------------------------------------------------------------------------------------------------------------------------------|----|
|                          |     | <i>Cross-sectional study</i> —If applicable, describe analytical methods taking account of sampling strategy                                                                                                 |    |
|                          |     | (e) Describe any sensitivity analyses                                                                                                                                                                        |    |
| <b>Results</b>           |     |                                                                                                                                                                                                              |    |
| Participants             | 13* | (a) Report numbers of individuals at each stage of study—eg numbers potentially eligible, examined for eligibility, confirmed eligible, included in the study, completing follow-up, and analysed            | X  |
|                          |     | (b) Give reasons for non-participation at each stage                                                                                                                                                         | X  |
|                          |     | (c) Consider use of a flow diagram                                                                                                                                                                           | NA |
| Descriptive data         | 14* | (a) Give characteristics of study participants (eg demographic, clinical, social) and information on exposures and potential confounders                                                                     | X  |
|                          |     | (b) Indicate number of participants with missing data for each variable of interest                                                                                                                          | X  |
|                          |     | (c) <i>Cohort study</i> —Summarise follow-up time (eg, average and total amount)                                                                                                                             | X  |
| Outcome data             | 15* | <i>Cohort study</i> —Report numbers of outcome events or summary measures over time                                                                                                                          | X  |
|                          |     | <i>Case-control study</i> —Report numbers in each exposure category, or summary measures of exposure                                                                                                         |    |
|                          |     | <i>Cross-sectional study</i> —Report numbers of outcome events or summary measures                                                                                                                           |    |
| Main results             | 16  | (a) Give unadjusted estimates and, if applicable, confounder-adjusted estimates and their precision (eg, 95% confidence interval). Make clear which confounders were adjusted for and why they were included | X  |
|                          |     | (b) Report category boundaries when continuous variables were categorized                                                                                                                                    | X  |
|                          |     | (c) If relevant, consider translating estimates of relative risk into absolute risk for a meaningful time period                                                                                             | X  |
| Other analyses           | 17  | Report other analyses done—eg analyses of subgroups and interactions, and sensitivity analyses                                                                                                               | NA |
| <b>Discussion</b>        |     |                                                                                                                                                                                                              |    |
| Key results              | 18  | Summarise key results with reference to study objectives                                                                                                                                                     | X  |
| Limitations              | 19  | Discuss limitations of the study, taking into account sources of potential bias or imprecision. Discuss both direction and magnitude of any potential bias                                                   | X  |
| Interpretation           | 20  | Give a cautious overall interpretation of results considering objectives, limitations, multiplicity of analyses, results from similar studies, and other relevant evidence                                   | X  |
| Generalisability         | 21  | Discuss the generalisability (external validity) of the study results                                                                                                                                        | X  |
| <b>Other information</b> |     |                                                                                                                                                                                                              |    |
| Funding                  | 22  | Give the source of funding and the role of the funders for the present study and, if applicable, for the original study on which the present article is based                                                | X  |

\*Give information separately for cases and controls in case-control studies and, if applicable, for exposed and unexposed groups in cohort and cross-sectional studies.

**Note:** An Explanation and Elaboration article discusses each checklist item and gives methodological background and published examples of transparent reporting. The STROBE checklist is best used in conjunction with this article (freely available on the Web sites of PLoS Medicine at <http://www.plosmedicine.org/>, Annals of Internal Medicine at <http://www.annals.org/>, and Epidemiology at <http://www.epidem.com/>). Information on the STROBE Initiative is available at [www.strobe-statement.org](http://www.strobe-statement.org).



**Adaptive capacity of the Adjusted Clinical Groups Case-Mix System to the cost of primary health care in Catalonia (Spain): A Observational Study**

|                                 |                                                                                                                                                                                                                              |
|---------------------------------|------------------------------------------------------------------------------------------------------------------------------------------------------------------------------------------------------------------------------|
| Journal:                        | <i>BMJ Open</i>                                                                                                                                                                                                              |
| Manuscript ID:                  | bmjopen-2012-000941.R1                                                                                                                                                                                                       |
| Article Type:                   | Research                                                                                                                                                                                                                     |
| Date Submitted by the Author:   | 08-Apr-2012                                                                                                                                                                                                                  |
| Complete List of Authors:       | Sicras-Mainar, Antoni; Badalona Serveis Assistencials SA, Directorate of Planning<br>Velasco-Velasco, Soledad<br>Navarro-Artieda, Ruth<br>Prados-Torres, Alexandra<br>Bolibar-Ribas, Buenaventura<br>Violan-Fors, Concepción |
| <b>Primary Subject Heading</b>: | Health services research                                                                                                                                                                                                     |
| Secondary Subject Heading:      | Epidemiology                                                                                                                                                                                                                 |
| Keywords:                       | EPIDEMIOLOGY, PUBLIC HEALTH, PRIMARY CARE                                                                                                                                                                                    |
|                                 |                                                                                                                                                                                                                              |

SCHOLARONE™  
Manuscripts

**TITLE PAGE****Adaptive capacity of the Adjusted Clinical Groups Case-Mix System to the cost of primary health care in Catalonia (Spain): A Observational Study****Authors**

Antoni Sicras-Mainar

Directorate of Planning. Badalona Serveis Assistencials SA, Badalona, Barcelona, Spain

[asicras@bsa.cat](mailto:asicras@bsa.cat)

Soledad Velasco-Velasco

Directorate of Planning. Badalona Serveis Assistencials SA, Badalona, Barcelona, Spain

[svelasco@bsa.cat](mailto:svelasco@bsa.cat)

Ruth Navarro-Artieda

Medical Documentation. Hospital Universitari Germans Trias i Pujol, Badalona, Barcelona, Spain

[rnavarro.germanstrias@gencat.cat](mailto:rnavarro.germanstrias@gencat.cat)

Alexandra Prados-Torres

Health Sciences Institute of Aragon, Zaragoza, Spain

[sprados.iacs@aragon.es](mailto:sprados.iacs@aragon.es)

Buenaventura Bolibar-Ribas

Jordi Gol i Gurina Primary Health Care Research Institute. IDIAP, Barcelona, Spain

[bbolibar@fundaciojgol.org](mailto:bbolibar@fundaciojgol.org)

Concepción Violan-Fors

Jordi Gol i Gurina Primary Health Care Research Institute. IDIAP, Barcelona, Spain

[cviolan@fundaciojgol.org](mailto:cviolan@fundaciojgol.org)

for the ACG Study Group<sup>1</sup>

<sup>1</sup>) The ACG Study Group is formed by: Catalonia (Alba Aguado Joda, Milagrosa Blanca-Tamayo, Esperanza Escribano-Herranz, Ferran Flor-Serra, Josep Ramon Llopart-López, Daniel Rodríguez-López, Encarna Sánchez-Fontcuberta, Josep Maria Vilaseca-Llobet), Balearic Islands (José Estelrich-Bennasar, Vicente Juan Verger, María Antònia Mir-Pons, María Vega Martín-Martín, Juan Antonio Pérez-Artigues, Amador Ruíz Torrejón) and Aragon (José María Abad-Díez, María Mercedes Aza Pascual-Salcedo, Daniel Bordonaba-Bosque, Amaya Calderón-Larrañaga, Francisca González-Rubio, Anselmo López-Cabañas, Jesús Magdalena-Belio, Beatriz Poblador-Plou, Antonio Poncel-Falcó).

**Correspondence to:**

Antoni Sicras Mainar

C. Gaietà Soler, 6-8 entlo . 08911 Badalona. Barcelona.

Teléfono: 93 507 26 84. e-mail: [asicras@bsa.cat](mailto:asicras@bsa.cat)



## ABSTRACT

*Objectives:* To describe the adaptive capacity of the Adjusted Clinical Groups (ACG) system to the cost of care in primary healthcare (PHC) centers in Catalonia (Spain).

*Design:* Retrospective study (multicenters) conducted using computerized medical records

*Setting:* 13 primary care teams in 2008 were included.

*Participants:* All patients registered in the study centers who required care between January 1 and December 31, 2008 were finally studied. Patients not registered in the study centers during the study period were excluded.

*Outcome measures:* demographic (age and sex), dependent (cost of care) and case mix variables were studied. The cost model for each patient was established by differentiating the fixed and variable costs. To evaluate the adaptive capacity of the ACG system, Pearson's coefficient of variation (CV) and the percentage of outliers were calculated. Multiple linear regression analysis was used for predictive models.

*Results:* The number of patients studied was 227,235 (frequency: 5.9 visits per person per year), with a mean of 4.5 (3.2) episodes and 8.1 (8.2) visits per patient per year. The mean total cost was €654.2. The explanatory power of the ACG system was 36.9% for costs (56.9% without outliers). Ten ACG categories accounted for 60.1% of all cases and 19 for 80.9%. Five categories represented 71% of poor performance (N = 78,887, 34.7%), particularly category 0300 -Acute Minor, Age 6+ (N = 26,909; 11.8%), which had a CV = 139% and 6.6% of outliers.

*Conclusions:* The ACG system is an appropriate manner of classifying patients in routine clinical practice in PHC centers in Catalonia, although improvements to the adaptive capacity through disaggregation of some categories according to age groups and, especially, the number of acute episodes in pediatric patients, would be necessary to reduce intra-group variation.

**Keywords:** Adjusted Clinical Groups. Poor performance. Use of resources. Primary care. Health care costs.

## ARTICLE SUMMARY

### *Article focus*

- In health management, separating financing, purchasing and the provision of services requires more precise instruments and measurement of healthcare activity.
- The Adjusted Clinical Groups (ACG) Case-Mix System is a system of risk adjustment that classifies persons according to the diseases they present over a given period.

### *Key messages*

- The ACG system is an appropriate manner of classifying patients in routine clinical practice in PHC centers in Catalonia.
- Although improvements to the adaptive capacity through disaggregation of some categories according to age groups and, especially, the number of acute episodes in pediatric patients, would be necessary to reduce intra-group variation.

### *Strengths and limitations of this study*

- The greatest limitations of the study are related to the quality of the records and information systems.
- Without standardization of methodologies in terms of patient characteristics and the number and measurement of variables, the results and their generalizability should be interpreted with caution.

## INTRODUCTION

In health management, separating financing, purchasing and the provision of services requires more precise instruments and measurement of healthcare activity<sup>1-2</sup>. Various countries are developing methods of per capita funding as a mechanism for allocating health care resources in a given region<sup>3</sup>. The Adjusted Clinical Groups (ACG) Case-Mix System is a system of risk adjustment that classifies persons according to the diseases they present over a given period. The main objective is to measure the degree of disease in patient populations according to different levels of morbidity<sup>4-5</sup>.

Classification systems for ambulatory patients, especially primary healthcare (PHC) patients, have not been widely used even in the USA, where they mainly originated. In addition, there is some uncertainty about the adaptive capacity of these instruments in health fields other than that for which they were designed. These classification systems relate the burden of disease, consumption of resources and the real costs of care<sup>6-11</sup>. Therefore, studies aimed at improving knowledge of the relationships between these factors can provide valuable evidence.

In general, ACG are accepted as useful in our setting and their use is increasing in various areas. However, some ACG categories seem to have excess variability and therefore we decided to study the performance of each ACG category in PHC centers in Catalonia<sup>6,12-13</sup>.

The aim of this study was to identify the retrospective adaptive capacity and poorly-performing categories of the ACG system according to the cost of care in various PHC centers in Catalonia (Spain) in daily clinical practice.

## METHODS

### *Design and study population*

We conducted a retrospective, multicenter study based on computerized medical records of PHC patients. All records were dissociated to ensure the confidentiality of the data. The study population consisted of all patients (N=310,235) assigned to thirteen PHC centers in Catalonia belonging to four service providers. The patient population was predominantly urban, lower-middle class, with industrial occupations. All centers included provide universal free-at-the-point-of care healthcare with private provision of services in concert with the Catalan Health Service. All patients registered in the study centers who required care between January 1 and December 31, 2008 were finally studied. Patients not registered in the study centers during the study period were excluded.

### *Data retrieval and processing*

Dependent variables were defined as the mean number of episodes and the direct costs of PHC. The independent variables analyzed were: age, sex, care provider and clinical service (family medicine [age  $\geq 15$  years] and pediatrics [age 0-14 years]). An episode or reason for consultation was considered as a care process equivalent to a diagnosis. The health problems diagnosed were coded using the International Classification for Primary Care (ICPC-2)<sup>14</sup>. A conversion (mapping) from ICPC-2 codes to ICD-9-CM was made by a working group (one documentalist, two clinicians and two technical consultants). Relationships between the ICPC-2 and ICD-9-CM were divided into three groups: 1) no relationship (ICPC-2 code with no equivalent in ICD-9-CM), 2) one-way relationship (one ICPC-2 code with a single equivalent in ICD-9-CM, the optimal situation) and 3) multiple relationships (one ICPC-2 code with several possible equivalents in ICD-9-CM).

The following measures were used to calculate overall morbidity: a) the Charlson comorbidity index<sup>15</sup> as an approximation of severity, and b) the individual case mix index, obtained using the ACG. The operating algorithm of the ACG Grouper version 8.2 (<http://www.acg.jhsph.edu>)<sup>16</sup> consists of a series of consecutive steps that result in 106 ACG, which are mutually-exclusive groups for each patient treated.

To construct an ACG, the age, sex and the reasons for consultation or diagnosis according to ICD-9-CM are required. The first stage groups the diagnoses of the ICD-9-CM in 32 Ambulatory Diagnostic Groups (ADG) (a patient may have one or more ADG), the second step groups the ADG into 12 Collapsed Ambulatory Diagnostic Groups (CADG), the third step transforms these into 25 Major Ambulatory Categories (MAC), and finally these are transformed into an ACG category. At the end of the process, each patient is assigned to a single group with similar resource consumption. The application provides resource utilization bands (RUB), with each patient being grouped into one of five mutually-exclusive categories according to their morbidity (1: healthy users, 2: low morbidity, 3: moderate morbidity, 4: high morbidity and 5: very high morbidity)<sup>4-5</sup>.

To measure the performance or adaptive capacity of each ACG category (intra-group variability of the total cost of care) we used: a) the Pearson coefficient of variation (CV), in which a coefficient greater than 100% was considered poor performance, b) the percentage of outliers obtained through data refining of variables. The cutoff point (T) for outliers was established using the formula:  $T=Q_3+1.5(Q_3-Q_1)$ , where  $Q_3$  and  $Q_1$  are the third and first quartile of the distribution, respectively.

### *Use of resources and cost model*

The design of the system of costs took into account the information requirements and degree of development of available information systems. The unit of care product used as the basis for the final calculation was the cost per patient treated during the study period. For each patient, we differentiated fixed costs and variable costs. The main fixed costs were: staff (salaries and wages), purchases (drugs, medical supplies, etc.), outsourced services (building repair and maintenance, professional services, etc.), and a set of costs relating to structural services and center management according to the General Accounting Plan for Health Care Centers. Fixed costs were allocated per visit (mean/unit: fixed costs/total number of visits). Variable costs per patient were calculated according to diagnostic petitions (laboratory, radiology, diagnostic or therapeutic, referrals to specialists and drug prescriptions). The tariffs used to calculate costs came from analytical cost-accounting studies (see Table 1). Finally, the cost per patient was calculated as:  $C_p = (\text{mean cost per visit} \times \text{number of visits} [\text{fixed costs}]) + (\text{variable costs})$ .

### *Data confidentiality*

According to Spanish law, being a retrospective design and because it is not investigated the effectiveness of any medicine, the study does not need specific approval from an IRB or the patient's consent, but instead required the dissociation of the data. The confidentiality of records according to the Organic Law on Data Protection (15/1999, December 13) was respected by dissociating the data.

### *Data quality and statistical analysis*

In a preliminary analysis we carefully reviewed the medical records to observe their frequency and distribution and to search for possible errors in recording or coding. We performed a descriptive univariate analysis including mean values, standard deviation (SD), proportions and percentiles. The normal distribution of variables was confirmed using the Kolmogorov-Smirnov test. In the bivariate analysis, we used the chi-square test, the Student t test, ANOVA, Pearson's linear correlation and the Mann-Whitney Wilcoxon nonparametric test. To evaluate the explanatory power of the ACG System we used the coefficient of determination ( $R^2$ ) obtained from the ratio intra-group variability/ total variability (ANOVA). Multiple linear regression analysis (method: stepwise, dependent variable: total cost) was used to determine the variables that best explained the cost of PHC (independents variables: age, sex, episodes, number ADG, RUB and pharmacy cost). The analysis was made using the SPSS for Windows v.18 statistical package. Statistical significance was established as  $p < 0.05$ .

## RESULTS

A total of 227,235 patients were registered in the study centers in 2008 (86.5% in family medicine and 13.5% in pediatrics). Table 2 details the general characteristics of the patient population, the co-morbidity and the total costs. Patients had a mean of 4.5 (3.2) episodes and 8.1 (8.2) visits per year. The percentage of males (51.1% vs. 43.3%,  $p < 0.001$ ) and visits (9.7 versus 7.8  $p < 0.001$ ) were higher in pediatric patients. The mean age of women was higher than that of men, 39.2 versus 37.8 ( $p < 0.001$ ). The total cost was 148.7 million euros (93.3% for family medicine). Drugs were prescribed to 80.1% of patients. Fixed costs accounted for 29.1% of total costs and variable costs for 70.9% (including 47.5% on drug prescriptions). Therefore, the mean total cost per patient per year was € 654.2 (851.7), € 702.5 in Family Medicine and Pediatric € 344.6,  $p < 0.001$ . A total of 6.2% of patients were considered outliers, and after data refining the mean unitary cost per year was € 556.7.

In the regression model (Table 3,  $N=227,235$ ), the cost of drugs and episodes explained 94% of total costs. The results of the model using cleansed data ( $N = 213,169$ ) were similar, although there was a greater beta coefficient for the episodes in comparison with the ADG (75.139 versus 10.023) although this did not modify the percentages of the coefficient of determination (0.917 versus 0.918). The association between the mean/unit cost according to age is shown in Figure 1. **In the multivariate analysis by including only the clinical variables age, sex and number of ADG, the  $R^2$  was 56.5%.**

The performance (patient distribution) and adaptive capacity (intra-group variation in categories) of the ACG classification are shown in Table 4. All patients were grouped in a category. However, no patients were grouped in 37 of the 106 categories, meaning that all patients were grouped in the remaining 69 categories. Furthermore, 61% of all patients were grouped in 10 categories and 80.9% in 19 ( $N = 183,721$ , Table 4). This distribution showed no significant differences according to the service provider. In 10 ACG categories, a poor performance (poor adaptive capacity) was observed ( $CV > 100\%$ ,  $N = 110,917$ , 48.8% of patients, Table 4 and Figure 2). The two categories with the highest CV were 1600-Preventive/Administrative ( $N = 8,527$ , 3.8%, outliers: 12.5%) and 1300-Psychosocial, w/o Psychosocial Unstable ( $N = 3,653$ , 1.6%, outliers: 10.7%).

We carried out a more-detailed analysis according to poor performance and the number of patients in each category. Table 5 shows the distribution of five ACG categories (making up 71% of poorly-performing categories,  $N = 78,887$ ). Compared with the total of 69 categories ( $N = 227,235$ ) these five categories had a lower explanatory power (coefficient of determination,  $R^2$ ) in episodes (44.3% versus 77.4%) **and total costs (18.8% versus 36.9%),  $p < 0.001$ .** For refined data, the results were 46.4% versus 78.4% for episodes and 36.5% versus 56.9% for total costs,  $p < 0.001$ . Category 0300-

1  
2  
3 Acute Minor, Age 6 + (N = 26,909; 11.8%) had a CV = 139% and 6.6% of outliers and showed  
4 significant differences before and after data refining. Categories 0400-Acute Major (N = 8160) and  
5 1800-Acute Minor/Acute Major (N = 9077) performed similarly. Category 4100-2-3 Other ADG  
6 Combinations, Age 35 +, had the highest number of patients (N = 28,864, 12.7%), with a high mean  
7 number of episodes (3.9 of total cases, compared to 4.5 in outliers,  $p < 0.001$ ), resulting in increased  
8 costs in these patients. The  $R^2$  of the five poorly-performing categories was 34.7%.  
9  
10  
11  
12  
13

## 14 15 16 **DISCUSSION**

17 This study determined the retrospective adaptive capacity of the ACG classification system according  
18 to the cost of PHC in Catalonia (Spain) in daily clinical practice, identifying 10 categories that  
19 performed poorly in the Catalan health system. In Catalonia, the use of capitation-based funding is  
20 still in its infancy compared to other European healthcare systems. The focus is on incorporating risk  
21 adjustment indicators in order to provide unbiased estimates of the expected costs of an individual  
22 patient in each health plan<sup>2-17</sup>.  
23  
24  
25  
26  
27

28 There is abundant published evidence on the use and overall performance of the ACG classification,  
29 but evidence on categories that perform poorly is very limited<sup>4-7,9,12,18-23</sup>. It is expected that persons  
30 with similar morbidity and demographic characteristics will have a similar use of resources. In this  
31 respect, the available empirical evidence shows that it is technically possible to find an adjustment  
32 formula to predict at least a portion of the variation in health expenditure per person, and also that the  
33 highest predictive values are achieved by systems that incorporate diagnostic information<sup>6,21,25</sup>. This  
34 has been proven in our study, since the number of episodes showed a greater explanatory power  
35 with respect to ACG categories than the total costs. Furthermore, data refining may lessen the weight  
36 of random factors in predicting expenditure, although it is known that no system of classification of  
37 patients into RUB explains all the variation in the use of resources<sup>6-7,10,26</sup>.  
38  
39  
40  
41  
42  
43  
44  
45

46 In general, the Grouper requires a limited number of variables for each patient: age, sex and  
47 diagnosis (not necessarily correlated in time). This simplicity of use is compatible with the needs of  
48 PHC, which must work with large daily volumes of information, limited time for each patient,  
49 professional cooperation (doctors, nurses, social workers, etc.) and repeated visits from the same  
50 patient. However, a greater degree of computerization of PHC and the establishment of mechanisms  
51 for consensus between health professionals would be required to increase data quality and the  
52 consistency of records, especially in the identification of diagnoses<sup>11,23</sup>.  
53  
54  
55  
56  
57  
58  
59  
60

1  
2  
3 The general results of the study (demographic variables [age and sex], case mix [morbidity] and  
4 resource use levels [RUB]), fall within the parameters expected in PHC in Spain. Furthermore, the  
5 distribution of patients within ACG categories is similar to the results obtained in other studies (60% of  
6 patients are grouped in 10 ACG categories), and stable over time<sup>4,6,8-9,12,18-23,25-28</sup>. In the different  
7 regression models analyzed, the number of episodes had a greater explanatory power than the ADG  
8 (dependent variable: cost of care), although there was a high correlation between the two variables  
9 (Tables 3 and 4).  
10  
11  
12  
13

14  
15 This may be because the grouping works by binary combinations of ADG, regardless of the number  
16 of recurrences and the type of disorder<sup>4,5</sup>. For example, a patient with one or more episodes of upper  
17 respiratory tract infection over time, with or without concomitant pharyngitis, may remain grouped in  
18 the same ACG category, resulting in widely-differing use of resources and degree of variation in  
19 costs. This point has been suggested by some authors as a limitation of the ACG system, although  
20 recent years have seen an expansion of categories from 51 to 103 to avoid such problems<sup>23</sup>.  
21  
22  
23  
24  
25

26  
27 Poor performance or adaptive capacity was observed in 10 ACG categories (N = 110,917, 48.8% of  
28 patients). The two categories with the highest CV were: Preventive/Administrative and Psychosocial,  
29 w/o Psychosocial Unstable. These results are difficult to compare for several reasons: a) These  
30 categories include many different circumstances and conditions (administrative processes, preventive  
31 actions and health promotion, unstable conditions with an unpredictable risk of recurrence, etc.), b)  
32 These conditions tend to be associated with poor-quality medical records (prescriptions not linked to  
33 a diagnosis, etc.), and c) The presence of different organizational models between centers (patient  
34 circuits, etc.) as a result of health policies, causing a high degree of variability that affects the use of  
35 resources and their costs.  
36  
37  
38  
39  
40  
41  
42

43 We found that five categories accounted for 71% of poor performance. In general, acute disease  
44 (0300-Acute Minor, Age 6 +, 0400-Acute Major and 1800-Acute Minor/Acute Major), representing a  
45 large number of pediatric patients, had a poor adaptive capacity. The ACG classification in Catalonia  
46 might be improved by expanding some of these categories according to age groups and, especially,  
47 by quantifying the number of episodes occurring during the study period. However, in the categories  
48 4100-2-3 Other ADG Combinations, Age 35 + and 3900-2-3 Other ADG Combinations, Males Age 18  
49 to 34, the performance with respect to classification into RUB could be improved by separating  
50 different ranges of episodes or ADG.  
51  
52  
53  
54  
55  
56  
57  
58  
59  
60



1  
2  
3 Therefore, a possible scenario for the debate on the funding model for PHC teams could be  
4 developed using a combination of factors: a) the weighting of structural costs related to accessibility,  
5 b) the variable costs according to the case-mix (ACG) and patient complexity, adapting the  
6 classification to the country, and c) quality targets derived from the policy sought by the purchaser  
7 and expected by the customer. In this aspect, the adaptive capacity of the ACG system to the Catalan  
8 setting could be bettered by improving the definition of some categories. This would facilitate policy  
9 making using benchmarking with respect to the complexity (case mix) and efficiency of PHC centers  
10 with the population served, enabling capitation payments (risk adjustment)<sup>4,26</sup>.

11  
12  
13  
14  
15  
16  
17 The greatest limitations of the study are related to the quality of the records and information systems.  
18 Without standardization of methodologies in terms of patient characteristics and the number and  
19 measurement of variables, the results and their generalizability should be interpreted with caution<sup>24</sup>.  
20 In addition, possible differences between health professionals in the selection of diagnoses may  
21 contaminate the comparison of costs between groups. However, strength of the study is that the large  
22 sample size could minimize these drawbacks. The ACG system was designed to measure the health  
23 status and medical resources consumed in a set of patients and, therefore, population-based studies  
24 of risk-adjusted capitation payments and the clinical management of PHC centers may be of  
25 considerable interest in Catalonia<sup>23, 29</sup>.

## 35 CONCLUSIONS

36  
37 The ACG system is an appropriate manner of classifying patients in routine clinical practice in PHC  
38 centers in Catalonia, although improvements to the adaptive capacity through disaggregation of some  
39 categories according to age groups and, especially, the number of acute episodes in pediatric  
40 patients, would be necessary to reduce intra-group variation.

41  
42  
43  
44  
45 **Funding:** This work was supported by Fondo de Investigaciones Sanitarias de la Seguridad Social (Instituto  
46 Carlos III, Majahonda, Madrid, Spain), grant number PI 08/1567.

47  
48 **Competing interests:** None.

49  
50 **Ethics approval:** The study project was approved by the Ethics and Clinical Research Committee of the Jordi  
51 Gol Clinical Research Institute (IDIAP Jordi Gol).

52  
53 **Contributors:** AS, SV, RN, CV, AP and MV planned the study. AS, RN and SV supervised the campaign  
54 registration, data entry and follow-up. AS was responsible for the statistical analysis with help from SV. AS  
55 wrote the first draft of the paper and has the primary responsibility for the final content. All authors contributed to  
56 and approved the final manuscript. AS is the head of the Catalan study.

57  
58 **Provenance and peer review:** Not commissioned; externally peer reviewed.

**REFERENCES**

1. Rice N, Smith P. Capitation and risk adjustment in health care financing: an international progress report. *The Milbank Quarterly*. 2001;79:81-113.
2. Forrest CB, Lemke KW, Bodycombe DP, Weiner JP. Medication, diagnostic, and cost information as predictors of high-risk patients in need of care management. *Am J Manag Care*. 2009;15:41-48.
3. Rico A, Saltman RB, Boerma WGW. Organizational restructuring in European health care systems: the role of primary care. *Social Policy Admin*. 2003;37:592-608.
4. Weiner JP, Starfield BH, Steinwachs DM, Mumford LM. Development and application of a population-oriented measure of ambulatory care case-mix. *Med Care*. 1991;29:452-72.
5. Starfield B, Lemke KW, Bernhardt T, Foldes SS, Forrest CB, Weiner JP. Comorbidity: implications for the importance of primary care in 'case' management. *Ann Fam Med*. 2003;1:8-14.
6. Sicras-Mainar A, Serrat-Tarres J. Measurement of relative cost weights as an effect of the retrospective application of adjusted clinical groups in primary care. *Gac Sanit*. 2006;20:132-41.
7. Petersen LA, Pietz K, Woodard LD, Byrne M. Comparison of the predictive validity of diagnosis-based risk adjusters for clinical outcomes. *Med Care*. 2005;43:61-7.
8. Hughes JS, Averill RF, Eisenhandler J, Goldfield NI, Muldoon J, Neff JM, Gay JC. Clinical Risk Groups (CRGs): a classification system for risk adjusted capitation-based payment and health care management. *Med Care*. 2004;42:81-90.
9. Meenan RT, Goodman MJ, Fishman PA, Hornbrook MC, O'Keeffe-Rosetti MC, Bachman DJ. Using risk-adjustment models to identify high-cost risks. *Med Care*. 2003;41:1301-12.
10. Buglioli M, Bonilla M, Ortún Rubio V. Sistemas de ajuste por riesgo. *Rev Med Uruguay*. 2000;16:123-32
11. Fusté J, Bolívar B, Castillo A, Coderch J, Ruano I, Sicras A. Hacia la definición de un conjunto mínimo básico de datos de atención primaria. *Aten Primaria*. 2002;30:229-235.
12. Aguado A, Guino E, Mukherjee B, Sicras A, Serrat J, Acedo M, Ferro JJ, Moreno V. Variability in prescription drug expenditures explained by adjusted clinical groups (ACG) case-mix: a cross-sectional study of patient electronic records in primary care. *BMC Health Serv Res*. 2008;8:53.
13. Sicras-Mainar A, Serrat-Tarrés J, Navarro-Artieda R, Llausí-Sellés R, Ruano-Ruano I, González-Ares JA. Adjusted Clinical Groups use as a measure of the referrals efficiency from primary care to specialized in Spain. *Eur J Public Health*. 2007;17:657-63.
14. Lamberts H, Wood M, Hofmans-Okkes IM (eds). *The International Classification of Primary Care in the European Community. With a multi-language layer*. Oxford: Oxford University Press, 1993.
15. Charlson ME, Pompei P, Ales KL, Mackenzie CR. A new method of classifying prognostic comorbidity in longitudinal studies: development and validation. *J Chronic Dis*. 1987;40:373-383.
16. The Johns Hopkins ACG<sup>®</sup> Case-mix System version 8.2. Johns Hopkins Bloomberg School of Public Health. Baltimore, 2008.

- 1  
2  
3  
4 17. Vargas I. La utilización del mecanismo de asignación per cápita: la experiencia de Cataluña. Cuadernos de Gestión 2002;8:167-78.  
5  
6  
7 18. Fishman PA, Goodman MJ, Hornbrook MC, Meenan RT, Bachman DJ, O'Keeffe Rosetti MC. Risk  
8 adjustment using automated ambulatory pharmacy data: the RxRisk model. Med Care. 2003;41:84-  
9 99.  
10  
11 19. Rosen AK, Loveland SA, Rakovski CC, Christiansen CL, Berlowitz DR. Do different case-mix  
12 measures affect assessments of provider efficiency? Lessons from the Department of Veterans  
13 Affairs. J Ambul Care Manage. 2003;26:229-42.  
14  
15 20. Shen Y, Ellis RP. How profitable is risk selection? A comparison of four risk adjustment models.  
16 Health Econ. 2002;11:165-74.  
17  
18 21. Carlsson L, Strender LE, Fridh G, Nilsson G. Types of morbidity and categories of patients in a  
19 Swedish county. Applying the Johns Hopkins Adjusted Clinical Groups System to encounter data in  
20 primary health care. Scand J Prim Health Care. 2004;22:174-9.  
21  
22 22. Reid RJ, MacWilliam L, Verhulst L, Roos N, Atkinson M. Performance of ACG case-mix system in  
23 two Canadian provinces. Med Care. 2001;39:86-99.  
24  
25 23. Chang HY, Weiner J. An in-depth assessment of a diagnosis-based risk adjustment model based  
26 on national health insurance claims: the application of the Johns Hopkins Adjusted Clinical Group  
27 case-mix system in Taiwan. BMC Medicine. 2010;8:7.  
28  
29 24. Sackett D, Rosenberg W, Gray J, Haynes R, Richardson W. Evidence based medicine: what it is  
30 and what it isn't. BMJ. 1996;312:71-72.  
31  
32 25. Orueta JF, Urraca J, Berraondo I, Darpon J, Aurrekoetxea JJ. Adjusted Clinical Groups (ACGs)  
33 explain the utilization of primary care in Spain based on information registered in the medical records:  
34 a cross-sectional study. Health Policy. 2006;76:38-48.  
35  
36 26. Greenwald LM. Medicare risk-adjusted capitation payments: from research to implementation.  
37 Health Care Financ Rev. 2000;21:1-5.  
38  
39 27. Reid RJ, Roos NP, MacWilliam L, Frohlich N, Black C: Assessing population health care need  
40 using a claims-based ACG morbidity measure: A validation analysis in the Province of Manitoba.  
41 Health Serv Res. 2002;37:1345-64.  
42  
43 28. Kuo R, Lai MS. Comparison of Rx-defined morbidity groups and diagnosis based risk adjusters  
44 for predicting healthcare costs in Taiwan. BMC Health Serv Res. 2010;10:126.  
45  
46 29. Gosden T, Forland F, Kristiansen IS, Sutton M, Leese B, Giuffrida A, Sergison M, Pedersen L.  
47 Capitation, salary, fee-for-service and mixed systems of payment: effects on the behaviour of primary  
48 care physicians. Cochrane Database Syst Rev. 2000;(3):CD002215.  
49  
50  
51  
52  
53  
54  
55  
56  
57  
58  
59  
60

Table 1: Mean unit costs in 2008

| Health resources                 | Unit cost (€) |
|----------------------------------|---------------|
| Health visit                     | 23.62         |
| Laboratory tests                 | 22.70         |
| Conventional radiology           | 18.84         |
| Diagnostic tests/therapy         | 37.85         |
| Referral to reference specialist | 106.29        |
| Drug prescriptions               | RRPvat        |

Source: analytical accounting conducted for this study, RRPvat: recommended retail price including Value Added Tax.

For peer review only

Table 2: General characteristics of study: co-morbidity and cost model

| Characteristics                         | Total         |        |
|-----------------------------------------|---------------|--------|
| Patients                                | N = 227,235   |        |
| <i>General</i>                          |               |        |
| Number of physicians                    | 224           |        |
| Number of episodes                      | 1,020,606     |        |
| Number of visits                        | 1,834,326     |        |
| Mean age, years                         | 44.1 (23.7)   |        |
| - 25 Percentile                         | 27.0          |        |
| - 50 Percentile                         | 43.0          |        |
| - 75 Percentile                         | 67.0          |        |
| Sex (female)                            | 55.6%         |        |
| <i>General co-morbidity</i>             |               |        |
| Mean ADG                                | 3.7 (2.2)     |        |
| - 25 Percentile                         | 2.0           |        |
| - 50 Percentile                         | 3.0           |        |
| - 75 Percentile                         | 5.0           |        |
| Mean episodes                           | 4.5 (3.2)     |        |
| Mean Charlson index                     | 0.2 (0.6)     |        |
| RUB                                     | 2.4 (0.8)     |        |
| 1                                       | 16.9%         |        |
| 2                                       | 31.0%         |        |
| 3                                       | 47.9%         |        |
| 4                                       | 3.8           |        |
| 5                                       | 0.5           |        |
| Outliers (N = 14,066)                   | 6.2%          |        |
| <i>Cost model (in euros) per year</i>   |               |        |
|                                         | Mean/unit     | %      |
| - Fixed costs                           | 190.7 (193.3) | 29.1%  |
| - Laboratory                            | 51.9 (73.8)   | 7.9%   |
| - Conventional radiology                | 21.4 (34.1)   | 3.3    |
| - Complementary tests                   | 6.2 (19.6)    | 1.0%   |
| - Referrals to specialists              | 73.1 (117.3)  | 11.2%  |
| - Drug prescriptions                    | 310.8 (681.2) | 47.5%  |
| Total cost of PHC                       | 654.2 (851.7) | 100.0% |
| - Cost of family medicine               | 92.9%         |        |
| - Cost of pediatric medicine(0-14years) | 7.1.          |        |

Values expressed as mean (SD: standard deviation) or percentage; RUB: resource utilization bands, ADG: Ambulatory Diagnostic Groups, PHC: Primary Health Care.

1  
2  
3  
4  
5  
6  
7  
8  
9  
10  
11  
12  
13  
14  
15  
16  
17  
18  
19  
20  
21  
22  
23  
24  
25  
26  
27  
28  
29  
30  
31  
32  
33  
34  
35  
36  
37  
38  
39  
40  
41  
42  
43  
44  
45  
46  
47  
48  
49

Table 3: Final result of multiple linear regression model.

| Final model                              | Beta    | 95% CI  |         | R <sup>2</sup> | t        | p      | Collinearity statistics |        |
|------------------------------------------|---------|---------|---------|----------------|----------|--------|-------------------------|--------|
|                                          |         | Li      | Ls      |                |          |        | Tolerance               | Factor |
| <i>Without data refining, N = 227235</i> |         |         |         |                |          |        |                         |        |
| Pharmacy cost                            | 1.000   | 0.998   | 1.002   | 0.879          | 1204.095 | <0.001 | 0.539                   | 1.856  |
| Episodes                                 | 80.878  | 79.290  | 82.466  | 0.944          | 99.810   | <0.001 | 0.025                   | 40.051 |
| RUB                                      | 22.631  | 21.263  | 23.999  | 0.946          | 32.426   | <0.001 | 0.512                   | 1.953  |
| Age                                      | 0.393   | 0.352   | 0.433   | 0.946          | 18.997   | <0.001 | 0.715                   | 1.399  |
| ADG                                      | -12.146 | -13.904 | -10.388 | 0.946          | -13.540  | <0.001 | 0.024                   | 41.647 |
| Sex                                      | -8.402  | -10.064 | -6.741  | 0.946          | -9.912   | <0.001 | 0.972                   | 1.029  |
| <i>With data refining, N = 213169</i>    |         |         |         |                |          |        |                         |        |
| Pharmacy cost                            | 1.031   | 1.029   | 1.033   | 0.826          | 893.708  | <0.001 | 0.584                   | 1.713  |
| Episodes                                 | 75.139  | 73.566  | 76.712  | 0.917          | 93.624   | <0.001 | 0.024                   | 42.008 |
| RUB                                      | 21.727  | 20.413  | 23.041  | 0.918          | 32.410   | <0.001 | 0.512                   | 1.954  |
| Age                                      | 0.387   | 0.346   | 0.428   | 0.918          | 18.613   | <0.001 | 0.667                   | 1.500  |
| ADG                                      | -10.023 | -11.755 | -8.291  | 0.918          | -11.340  | <0.001 | 0.023                   | 43.539 |
| Sex                                      | -7.367  | -8.960  | -5.773  | 0.918          | -9.062   | <0.001 | 0.973                   | 1.028  |

Dependent variable: total cost, input method: stepwise, CI: confidence intervals; Li: lower limit; Ls: upper limit; p: statistical significance, t: Student test; R<sup>2</sup>: coefficient of determination; RUB: resource utilization bands, ADG: Ambulatory Diagnostic Groups. The cutoff (T) for data refining of outliers was established using the formula:  $T = Q_3 + 1.5(Q_3 - Q_1)$  where  $Q_3$  and  $Q_1$  are the third and first quartiles of the distribution, respectively.

Table 4: Distribution of ACG categories with the most patients: variability of categories

| ACG  | ACG Description                                                 | N     | %     | Cost <sup>(1)</sup> | CV   | Outliers <sup>(2)</sup> |
|------|-----------------------------------------------------------------|-------|-------|---------------------|------|-------------------------|
| 4100 | 2-3 Other ADG Combinations, Age 35+                             | 28864 | 12.7% | 776.3               | 107% | 6.5%                    |
| 0300 | Acute Minor, Age 6+                                             | 26909 | 11.8% | 169.6               | 139% | 6.6%                    |
| 4910 | 6-9 Other ADG Combinations, Age 35+, 0-1 Major ADGs             | 14876 | 6.5%  | 1,624.4             | 67%  | 4.5%                    |
| 2100 | Acute Minor/Likely to Recur, Age 6+, w/o Allergy                | 11867 | 5.2%  | 304.7               | 91%  | 5.3%                    |
| 4410 | 4-5 Other ADG Combinations, Age 45+, no Major ADGs              | 10551 | 4.6%  | 1,025.4             | 74%  | 5.3%                    |
| 4420 | 4-5 Other ADG Combinations, Age 45+, 1 Major ADGs               | 10137 | 4.5%  | 1,336.2             | 79%  | 4.6%                    |
| 0500 | Likely to Recur, w/o Allergies                                  | 9872  | 4.3%  | 187.2               | 140% | 6.6%                    |
| 1800 | Acute Minor/Acute Major                                         | 9077  | 4.0%  | 353.2               | 104% | 5.9%                    |
| 1600 | Preventive/Administrative                                       | 8527  | 3.8%  | 229.5               | 215% | 12.5%                   |
| 0400 | Acute Major                                                     | 8160  | 3.6%  | 237.3               | 160% | 8.1%                    |
| 0900 | Chronic Medical: Stable                                         | 6319  | 2.8%  | 506.7               | 114% | 6.2%                    |
| 3900 | 2-3 Other ADG Combinations, Males Age 18 to 34                  | 5877  | 2.6%  | 341.7               | 117% | 6.0%                    |
| 3200 | Acute Minor/Acute Major/Likely to Recur, Age 12+, w/o Allergy   | 5785  | 2.5%  | 525.0               | 89%  | 6.3%                    |
| 2300 | Acute Minor/Chronic Medical: Stable                             | 5756  | 2.5%  | 612.6               | 95%  | 6.3%                    |
| 3600 | Acute Minor/Acute Major/Likely to Recur/Chronic Medical: Stable | 5575  | 2.5%  | 1,022.1             | 72%  | 5.0%                    |
| 4310 | 4-5 Other ADG Combinations, Age 18 to 44, no Major ADGs         | 4168  | 1.8%  | 554.8               | 86%  | 6.4%                    |
| 4920 | 6-9 Other ADG Combinations, Age 35+, 2 Major ADGs               | 4089  | 1.8%  | 2,102.5             | 67%  | 3.5%                    |
| 2800 | Acute Major/Likely to Recur                                     | 3659  | 1.6%  | 351.0               | 102% | 6.9%                    |
| 1300 | Psychosocial, w/o Psychosocial Unstable                         | 3653  | 1.6%  | 340.4               | 175% | 10.7%                   |

Nineteen ACG categories contain 80.9% of patients (N = 183,721). No patient was grouped in 37 ACG categories; ACG, Adjusted Clinical Groups (Code)<sup>(1)</sup>: Gross cost (mean/unit in euros), CV: Pearson's Coefficient of Variation,<sup>(2)</sup>:outliers: percentage of patients, cut-off:  $T = Q_3 + 1.5(Q_3 - Q_1)$  where  $Q_3$  and  $Q_1$  are the third and first quartiles of the distribution, respectively. Total sample: N = 227235, CV = 130.0%, outliers: 6.2%.

Table 5: Distribution of five poorly-performing ACG categories according to age, episodes and cost

| ACG categories (coding and description)                     | Total | No outliers   | Outliers |               |      |                 |
|-------------------------------------------------------------|-------|---------------|----------|---------------|------|-----------------|
| Variables                                                   | N     | Mean          | N        | Mean          | N    | Mean            |
| <i>4100: 2-3 Other ADG Combinations, Age 35+</i>            | 28864 |               | 26992    |               | 1872 |                 |
| Age                                                         |       | 60.5 (14.8)   |          | 59.7 (14.6)   |      | 70.9 (12.8)     |
| Episodes                                                    |       | 3.9 (1.3)     |          | 3.9 (1.2)     |      | 4.5 (1.5)       |
| Total cost                                                  |       | 776.3 (828.2) |          | 620.3 (448.7) |      | 3026.1 (1504.4) |
| <i>0300: Acute Minor, Age 6+</i>                            | 26909 |               | 25142    |               | 1767 |                 |
| Age                                                         |       | 33.1 (16.5)   |          | 31.9 (15.4)   |      | 50.5 (22.1)     |
| Episodes                                                    |       | 1.7 (1.1)     |          | 1.7 (0.9)     |      | 2.5 (1.4)       |
| Total cost                                                  |       | 169.5 (236.5) |          | 125.2 (91.7)  |      | 800.0 (554.3)   |
| <i>1800: Acute Minor/Acute Major</i>                        | 9077  |               | 8538     |               | 539  |                 |
| Age                                                         |       | 32.1 (19.8)   |          | 30.8 (18.5)   |      | 51.6 (27.1)     |
| Episodes                                                    |       | 3.6 (1.5)     |          | 3.6 (1.4)     |      | 4.8 (2.3)       |
| Total cost                                                  |       | 353.2 (366.2) |          | 288.7 (166.5) |      | 1374.2 (843.8)  |
| <i>0400: Acute Major</i>                                    | 8160  |               | 7503     |               | 657  |                 |
| Age                                                         |       | 38.5 (18.2)   |          | 36.6 (16.7)   |      | 59.9 (20.6)     |
| Episodes                                                    |       | 1.6 (0.8)     |          | 1.5 (0.7)     |      | 2.1 (1.1)       |
| Total cost                                                  |       | 237.3 (379.5) |          | 158.3 (108.7) |      | 1139.1 (877.8)  |
| <i>3900: 2-3 Other ADG Combinations, Males Age 18 to 34</i> | 5877  |               | 5523     |               | 354  |                 |
| Age                                                         |       | 28.1 (4.5)    |          | 28.0 (4.5)    |      | 28.7 (4.2)      |
| Episodes                                                    |       | 3.3 (1.0)     |          | 3.3 (1.1)     |      | 3.8 (1.2)       |
| Total cost                                                  |       | 341.6 (399.1) |          | 273.7 (154.1) |      | 1401.2 (1040.1) |

Contrast statistic: Chi<sup>2</sup> test or Mann-Whitney Wilcoxon test; p<0.001 in all cases, ADG: Ambulatory Diagnostic Groups; coefficient of determination (R<sup>2</sup>): intra-group/total variability (ANOVA).



Figure 1: Correlation of the cost of care according to age.



R<sup>2</sup>: Coefficient of determination; model adjusted by linear regression

1  
2  
3  
4  
5  
6  
7  
8  
9  
10  
11  
12  
13  
14  
15  
16  
17  
18  
19  
20  
21  
22  
23  
24  
25  
26  
27  
28  
29  
30  
31  
32  
33  
34  
35  
36  
37  
38  
39  
40  
41  
42  
43  
44  
45  
46  
47  
48  
49  
50  
51  
52  
53  
54  
55  
56  
57  
58  
59  
60

Figure 2: Percentage distribution of coefficients of variation according to the number of categories, patients and outliers

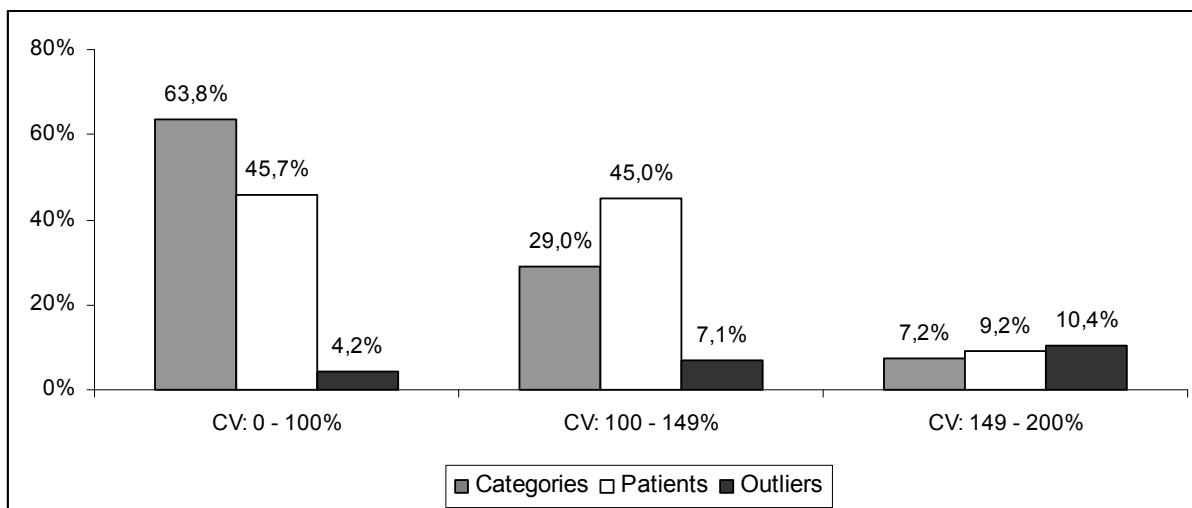

CV: Pearson's coefficient of variation; contrast statistic:  $\chi^2$ ,  $p < 0.001$  for all categories.

Peer review only

**STROBE 2007 (v4) checklist of items to be included in reports of observational studies in epidemiology\***  
**Checklist for cohort, case-control, and cross-sectional studies (combined)**

| Section/Topic             | Item # | Recommendation                                                                                                                                                                                                                                                                                                                                                                                                                                                         | Reported on page # |
|---------------------------|--------|------------------------------------------------------------------------------------------------------------------------------------------------------------------------------------------------------------------------------------------------------------------------------------------------------------------------------------------------------------------------------------------------------------------------------------------------------------------------|--------------------|
| Title and abstract        | 1      | (a) Indicate the study's design with a commonly used term in the title or the abstract                                                                                                                                                                                                                                                                                                                                                                                 | X                  |
|                           |        | (b) Provide in the abstract an informative and balanced summary of what was done and what was found                                                                                                                                                                                                                                                                                                                                                                    | X                  |
| <b>Introduction</b>       |        |                                                                                                                                                                                                                                                                                                                                                                                                                                                                        |                    |
| Background/rationale      | 2      | Explain the scientific background and rationale for the investigation being reported                                                                                                                                                                                                                                                                                                                                                                                   | X                  |
| Objectives                | 3      | State specific objectives, including any pre-specified hypotheses                                                                                                                                                                                                                                                                                                                                                                                                      | X                  |
| <b>Methods</b>            |        |                                                                                                                                                                                                                                                                                                                                                                                                                                                                        |                    |
| Study design              | 4      | Present key elements of study design early in the paper                                                                                                                                                                                                                                                                                                                                                                                                                | X                  |
| Setting                   | 5      | Describe the setting, locations, and relevant dates, including periods of recruitment, exposure, follow-up, and data collection                                                                                                                                                                                                                                                                                                                                        | X                  |
| Participants              | 6      | (a) <i>Cohort study</i> —Give the eligibility criteria, and the sources and methods of selection of participants. Describe methods of follow-up<br><i>Case-control study</i> —Give the eligibility criteria, and the sources and methods of case ascertainment and control selection. Give the rationale for the choice of cases and controls<br><i>Cross-sectional study</i> —Give the eligibility criteria, and the sources and methods of selection of participants | X                  |
|                           |        | (b) <i>Cohort study</i> —For matched studies, give matching criteria and number of exposed and unexposed<br><i>Case-control study</i> —For matched studies, give matching criteria and the number of controls per case                                                                                                                                                                                                                                                 |                    |
| Variables                 | 7      | Clearly define all outcomes, exposures, predictors, potential confounders, and effect modifiers. Give diagnostic criteria, if applicable                                                                                                                                                                                                                                                                                                                               | X                  |
| Data sources/ measurement | 8*     | For each variable of interest, give sources of data and details of methods of assessment (measurement). Describe comparability of assessment methods if there is more than one group                                                                                                                                                                                                                                                                                   | X                  |
| Bias                      | 9      | Describe any efforts to address potential sources of bias                                                                                                                                                                                                                                                                                                                                                                                                              | X                  |
| Study size                | 10     | Explain how the study size was arrived at                                                                                                                                                                                                                                                                                                                                                                                                                              | NA                 |
| Quantitative variables    | 11     | Explain how quantitative variables were handled in the analyses. If applicable, describe which groupings were chosen and why                                                                                                                                                                                                                                                                                                                                           | X                  |
| Statistical methods       | 12     | (a) Describe all statistical methods, including those used to control for confounding                                                                                                                                                                                                                                                                                                                                                                                  | X                  |
|                           |        | (b) Describe any methods used to examine subgroups and interactions                                                                                                                                                                                                                                                                                                                                                                                                    | NA                 |
|                           |        | (c) Explain how missing data were addressed                                                                                                                                                                                                                                                                                                                                                                                                                            | X                  |
|                           |        | (d) <i>Cohort study</i> —If applicable, explain how loss to follow-up was addressed<br><i>Case-control study</i> —If applicable, explain how matching of cases and controls was addressed                                                                                                                                                                                                                                                                              | X                  |

|                          |     |                                                                                                                                                                                                              |    |
|--------------------------|-----|--------------------------------------------------------------------------------------------------------------------------------------------------------------------------------------------------------------|----|
|                          |     | <i>Cross-sectional study</i> —If applicable, describe analytical methods taking account of sampling strategy                                                                                                 |    |
|                          |     | (e) Describe any sensitivity analyses                                                                                                                                                                        |    |
| <b>Results</b>           |     |                                                                                                                                                                                                              |    |
| Participants             | 13* | (a) Report numbers of individuals at each stage of study—eg numbers potentially eligible, examined for eligibility, confirmed eligible, included in the study, completing follow-up, and analysed            | X  |
|                          |     | (b) Give reasons for non-participation at each stage                                                                                                                                                         | X  |
|                          |     | (c) Consider use of a flow diagram                                                                                                                                                                           | NA |
| Descriptive data         | 14* | (a) Give characteristics of study participants (eg demographic, clinical, social) and information on exposures and potential confounders                                                                     | X  |
|                          |     | (b) Indicate number of participants with missing data for each variable of interest                                                                                                                          | X  |
|                          |     | (c) <i>Cohort study</i> —Summarise follow-up time (eg, average and total amount)                                                                                                                             | X  |
| Outcome data             | 15* | <i>Cohort study</i> —Report numbers of outcome events or summary measures over time                                                                                                                          | X  |
|                          |     | <i>Case-control study</i> —Report numbers in each exposure category, or summary measures of exposure                                                                                                         |    |
|                          |     | <i>Cross-sectional study</i> —Report numbers of outcome events or summary measures                                                                                                                           |    |
| Main results             | 16  | (a) Give unadjusted estimates and, if applicable, confounder-adjusted estimates and their precision (eg, 95% confidence interval). Make clear which confounders were adjusted for and why they were included | X  |
|                          |     | (b) Report category boundaries when continuous variables were categorized                                                                                                                                    | X  |
|                          |     | (c) If relevant, consider translating estimates of relative risk into absolute risk for a meaningful time period                                                                                             | X  |
| Other analyses           | 17  | Report other analyses done—eg analyses of subgroups and interactions, and sensitivity analyses                                                                                                               | NA |
| <b>Discussion</b>        |     |                                                                                                                                                                                                              |    |
| Key results              | 18  | Summarise key results with reference to study objectives                                                                                                                                                     | X  |
| Limitations              | 19  | Discuss limitations of the study, taking into account sources of potential bias or imprecision. Discuss both direction and magnitude of any potential bias                                                   | X  |
| Interpretation           | 20  | Give a cautious overall interpretation of results considering objectives, limitations, multiplicity of analyses, results from similar studies, and other relevant evidence                                   | X  |
| Generalisability         | 21  | Discuss the generalisability (external validity) of the study results                                                                                                                                        | X  |
| <b>Other information</b> |     |                                                                                                                                                                                                              |    |
| Funding                  | 22  | Give the source of funding and the role of the funders for the present study and, if applicable, for the original study on which the present article is based                                                | X  |

\*Give information separately for cases and controls in case-control studies and, if applicable, for exposed and unexposed groups in cohort and cross-sectional studies.

**Note:** An Explanation and Elaboration article discusses each checklist item and gives methodological background and published examples of transparent reporting. The STROBE checklist is best used in conjunction with this article (freely available on the Web sites of PLoS Medicine at <http://www.plosmedicine.org/>, Annals of Internal Medicine at <http://www.annals.org/>, and Epidemiology at <http://www.epidem.com/>). Information on the STROBE Initiative is available at [www.strobe-statement.org](http://www.strobe-statement.org).



**Adaptive capacity of the Adjusted Clinical Groups Case-Mix System to the cost of primary health care in Catalonia (Spain): A Observational Study**

|                                 |                                                                                                                                                                                                                              |
|---------------------------------|------------------------------------------------------------------------------------------------------------------------------------------------------------------------------------------------------------------------------|
| Journal:                        | <i>BMJ Open</i>                                                                                                                                                                                                              |
| Manuscript ID:                  | bmjopen-2012-000941.R2                                                                                                                                                                                                       |
| Article Type:                   | Research                                                                                                                                                                                                                     |
| Date Submitted by the Author:   | 02-May-2012                                                                                                                                                                                                                  |
| Complete List of Authors:       | Sicras-Mainar, Antoni; Badalona Serveis Assistencials SA, Directorate of Planning<br>Velasco-Velasco, Soledad<br>Navarro-Artieda, Ruth<br>Prados-Torres, Alexandra<br>Bolibar-Ribas, Buenaventura<br>Violan-Fors, Concepción |
| <b>Primary Subject Heading</b>: | Health services research                                                                                                                                                                                                     |
| Secondary Subject Heading:      | Epidemiology, Health economics                                                                                                                                                                                               |
| Keywords:                       | EPIDEMIOLOGY, PUBLIC HEALTH, PRIMARY CARE                                                                                                                                                                                    |
|                                 |                                                                                                                                                                                                                              |

SCHOLARONE™  
Manuscripts

STROBE 2007 (v4) checklist of items to be included in reports of observational studies in epidemiology\*  
Checklist for cohort, case-control, and cross-sectional studies (combined)

| Section/Topic             | Item # | Recommendation                                                                                                                                                                                                                                                                                                                                                                                                                                                         | Reported on page # |
|---------------------------|--------|------------------------------------------------------------------------------------------------------------------------------------------------------------------------------------------------------------------------------------------------------------------------------------------------------------------------------------------------------------------------------------------------------------------------------------------------------------------------|--------------------|
| Title and abstract        | 1      | (a) Indicate the study’s design with a commonly used term in the title or the abstract                                                                                                                                                                                                                                                                                                                                                                                 | X                  |
|                           |        | (b) Provide in the abstract an informative and balanced summary of what was done and what was found                                                                                                                                                                                                                                                                                                                                                                    | X                  |
| <b>Introduction</b>       |        |                                                                                                                                                                                                                                                                                                                                                                                                                                                                        |                    |
| Background/rationale      | 2      | Explain the scientific background and rationale for the investigation being reported                                                                                                                                                                                                                                                                                                                                                                                   | X                  |
| Objectives                | 3      | State specific objectives, including any pre-specified hypotheses                                                                                                                                                                                                                                                                                                                                                                                                      | X                  |
| <b>Methods</b>            |        |                                                                                                                                                                                                                                                                                                                                                                                                                                                                        |                    |
| Study design              | 4      | Present key elements of study design early in the paper                                                                                                                                                                                                                                                                                                                                                                                                                | X                  |
| Setting                   | 5      | Describe the setting, locations, and relevant dates, including periods of recruitment, exposure, follow-up, and data collection                                                                                                                                                                                                                                                                                                                                        | X                  |
| Participants              | 6      | (a) <i>Cohort study</i> —Give the eligibility criteria, and the sources and methods of selection of participants. Describe methods of follow-up<br><i>Case-control study</i> —Give the eligibility criteria, and the sources and methods of case ascertainment and control selection. Give the rationale for the choice of cases and controls<br><i>Cross-sectional study</i> —Give the eligibility criteria, and the sources and methods of selection of participants | X                  |
|                           |        | (b) <i>Cohort study</i> —For matched studies, give matching criteria and number of exposed and unexposed<br><i>Case-control study</i> —For matched studies, give matching criteria and the number of controls per case                                                                                                                                                                                                                                                 |                    |
| Variables                 | 7      | Clearly define all outcomes, exposures, predictors, potential confounders, and effect modifiers. Give diagnostic criteria, if applicable                                                                                                                                                                                                                                                                                                                               | X                  |
| Data sources/ measurement | 8*     | For each variable of interest, give sources of data and details of methods of assessment (measurement). Describe comparability of assessment methods if there is more than one group                                                                                                                                                                                                                                                                                   | X                  |
| Bias                      | 9      | Describe any efforts to address potential sources of bias                                                                                                                                                                                                                                                                                                                                                                                                              | X                  |
| Study size                | 10     | Explain how the study size was arrived at                                                                                                                                                                                                                                                                                                                                                                                                                              | NA                 |
| Quantitative variables    | 11     | Explain how quantitative variables were handled in the analyses. If applicable, describe which groupings were chosen and why                                                                                                                                                                                                                                                                                                                                           | X                  |
| Statistical methods       | 12     | (a) Describe all statistical methods, including those used to control for confounding                                                                                                                                                                                                                                                                                                                                                                                  | X                  |
|                           |        | (b) Describe any methods used to examine subgroups and interactions                                                                                                                                                                                                                                                                                                                                                                                                    | NA                 |
|                           |        | (c) Explain how missing data were addressed                                                                                                                                                                                                                                                                                                                                                                                                                            | X                  |
|                           |        | (d) <i>Cohort study</i> —If applicable, explain how loss to follow-up was addressed<br><i>Case-control study</i> —If applicable, explain how matching of cases and controls was addressed                                                                                                                                                                                                                                                                              | X                  |

|                          |     |                                                                                                                                                                                                              |    |
|--------------------------|-----|--------------------------------------------------------------------------------------------------------------------------------------------------------------------------------------------------------------|----|
|                          |     | <i>Cross-sectional study</i> —If applicable, describe analytical methods taking account of sampling strategy                                                                                                 |    |
|                          |     | (e) Describe any sensitivity analyses                                                                                                                                                                        |    |
| <b>Results</b>           |     |                                                                                                                                                                                                              |    |
| Participants             | 13* | (a) Report numbers of individuals at each stage of study—eg numbers potentially eligible, examined for eligibility, confirmed eligible, included in the study, completing follow-up, and analysed            | X  |
|                          |     | (b) Give reasons for non-participation at each stage                                                                                                                                                         | X  |
|                          |     | (c) Consider use of a flow diagram                                                                                                                                                                           | NA |
| Descriptive data         | 14* | (a) Give characteristics of study participants (eg demographic, clinical, social) and information on exposures and potential confounders                                                                     | X  |
|                          |     | (b) Indicate number of participants with missing data for each variable of interest                                                                                                                          | X  |
|                          |     | (c) <i>Cohort study</i> —Summarise follow-up time (eg, average and total amount)                                                                                                                             | X  |
| Outcome data             | 15* | <i>Cohort study</i> —Report numbers of outcome events or summary measures over time                                                                                                                          | X  |
|                          |     | <i>Case-control study</i> —Report numbers in each exposure category, or summary measures of exposure                                                                                                         |    |
|                          |     | <i>Cross-sectional study</i> —Report numbers of outcome events or summary measures                                                                                                                           |    |
| Main results             | 16  | (a) Give unadjusted estimates and, if applicable, confounder-adjusted estimates and their precision (eg, 95% confidence interval). Make clear which confounders were adjusted for and why they were included | X  |
|                          |     | (b) Report category boundaries when continuous variables were categorized                                                                                                                                    | X  |
|                          |     | (c) If relevant, consider translating estimates of relative risk into absolute risk for a meaningful time period                                                                                             | X  |
| Other analyses           | 17  | Report other analyses done—eg analyses of subgroups and interactions, and sensitivity analyses                                                                                                               | NA |
| <b>Discussion</b>        |     |                                                                                                                                                                                                              |    |
| Key results              | 18  | Summarise key results with reference to study objectives                                                                                                                                                     | X  |
| Limitations              | 19  | Discuss limitations of the study, taking into account sources of potential bias or imprecision. Discuss both direction and magnitude of any potential bias                                                   | X  |
| Interpretation           | 20  | Give a cautious overall interpretation of results considering objectives, limitations, multiplicity of analyses, results from similar studies, and other relevant evidence                                   | X  |
| Generalisability         | 21  | Discuss the generalisability (external validity) of the study results                                                                                                                                        | X  |
| <b>Other information</b> |     |                                                                                                                                                                                                              |    |
| Funding                  | 22  | Give the source of funding and the role of the funders for the present study and, if applicable, for the original study on which the present article is based                                                | X  |

\*Give information separately for cases and controls in case-control studies and, if applicable, for exposed and unexposed groups in cohort and cross-sectional studies.

**Note:** An Explanation and Elaboration article discusses each checklist item and gives methodological background and published examples of transparent reporting. The STROBE checklist is best used in conjunction with this article (freely available on the Web sites of PLoS Medicine at <http://www.plosmedicine.org/>, Annals of Internal Medicine at <http://www.annals.org/>, and Epidemiology at <http://www.epidem.com/>). Information on the STROBE Initiative is available at [www.strobe-statement.org](http://www.strobe-statement.org).

**TITLE PAGE****Adaptive capacity of the Adjusted Clinical Groups Case-Mix System to the cost of primary health care in Catalonia (Spain): A Observational Study****Authors**

Antoni Sicras-Mainar

Directorate of Planning. Badalona Serveis Assistencials SA, Badalona, Barcelona, Spain

[asicras@bsa.cat](mailto:asicras@bsa.cat)

Soledad Velasco-Velasco

Directorate of Planning. Badalona Serveis Assistencials SA, Badalona, Barcelona, Spain

[svelasco@bsa.cat](mailto:svelasco@bsa.cat)

Ruth Navarro-Artieda

Medical Documentation. Hospital Universitari Germans Trias i Pujol, Badalona, Barcelona, Spain

[rnavarro.germanstrias@gencat.cat](mailto:rnavarro.germanstrias@gencat.cat)

Alexandra Prados-Torres

Health Sciences Institute of Aragon, Zaragoza, Spain

[sprados.iacs@aragon.es](mailto:sprados.iacs@aragon.es)

Buenaventura Bolibar-Ribas

Jordi Gol i Gurina Primary Health Care Research Institute. IDIAP, Barcelona, Spain

[bbolibar@fundaciojgol.org](mailto:bbolibar@fundaciojgol.org)

Concepción Violan-Fors

Jordi Gol i Gurina Primary Health Care Research Institute. IDIAP, Barcelona, Spain

[cviolan@fundaciojgol.org](mailto:cviolan@fundaciojgol.org)

for the ACG Study Group<sup>1</sup>

<sup>1</sup>) The ACG Study Group is formed by: Catalonia (Alba Aguado Joda, Milagrosa Blanca-Tamayo, Esperanza Escribano-Herranz, Ferran Flor-Serra, Josep Ramón Llopart-López, Daniel Rodríguez-López, Encarna Sánchez-Fontcuberta, Josep Maria Vilaseca-Llobet), Balearic Islands (José Estelrich-Bennasar, Vicente Juan Verger, María Antònia Mir-Pons, María Vega Martín-Martín, Juan Antonio Pérez-Artigues, Amador Ruíz Torrejón) and Aragon (José María Abad-Díez, María Mercedes Aza Pascual-Salcedo, Daniel Bordonaba-Bosque, Amaya Calderón-Larrañaga, Francisca González-Rubio, Anselmo López-Cabañas, Jesús Magdalena-Belio, Beatriz Poblador-Plou, Antonio Poncel-Falcó).

**Correspondence to:**

Antoni Sicras Mainar

C. Gaietà Soler, 6-8 entlo . 08911 Badalona. Barcelona.

Teléfono: 93 507 26 84. e-mail: [asicras@bsa.cat](mailto:asicras@bsa.cat)



## ABSTRACT

*Objectives:* To describe the adaptive capacity of the Adjusted Clinical Groups (ACG) system to the cost of care in primary healthcare (PHC) centers in Catalonia (Spain).

*Design:* Retrospective study (multicenters) conducted using computerized medical records

*Setting:* 13 primary care teams in 2008 were included.

*Participants:* All patients registered in the study centers who required care between January 1 and December 31, 2008 were finally studied. Patients not registered in the study centers during the study period were excluded.

*Outcome measures:* demographic (age and sex), dependent (cost of care) and case mix variables were studied. The cost model for each patient was established by differentiating the fixed and variable costs. To evaluate the adaptive capacity of the ACG system, Pearson's coefficient of variation (CV) and the percentage of outliers were calculated. **To evaluate the explanatory power of the ACG System we used the coefficient of determination ( $R^2$ ).**

*Results:* The number of patients studied was 227,235 (frequency: 5.9 visits per person per year), with a mean of 4.5 (3.2) episodes and 8.1 (8.2) visits per patient per year. The mean total cost was €654.2. The explanatory power of the ACG system was 36.9% for costs (**56.5% without outliers**). Ten ACG categories accounted for 60.1% of all cases and 19 for 80.9%. Five categories represented 71% of poor performance (N = 78,887, 34.7%), particularly category 0300 -Acute Minor, Age 6+ (N = 26,909; 11.8%), which had a CV = 139% and 6.6% of outliers.

*Conclusions:* The ACG system is an appropriate manner of classifying patients in routine clinical practice in PHC centers in Catalonia, although improvements to the adaptive capacity through disaggregation of some categories according to age groups and, especially, the number of acute episodes in pediatric patients, would be necessary to reduce intra-group variation.

**Keywords:** Adjusted Clinical Groups. Poor performance. Use of resources. Primary care. Health care costs.

## ARTICLE SUMMARY

### *Article focus*

- In health management, separating financing, purchasing and the provision of services requires more precise instruments and measurement of healthcare activity.
- The Adjusted Clinical Groups (ACG) Case-Mix System is a system of risk adjustment that classifies persons according to the diseases they present over a given period.

### *Key messages*

- The ACG system is an appropriate manner of classifying patients in routine clinical practice in PHC centers in Catalonia.
- Although improvements to the adaptive capacity through disaggregation of some categories according to age groups and, especially, the number of acute episodes in pediatric patients, would be necessary to reduce intra-group variation.

### *Strengths and limitations of this study*

- The greatest limitations of the study are related to the quality of the records and information systems.
- Without standardization of methodologies in terms of patient characteristics and the number and measurement of variables, the results and their generalizability should be interpreted with caution.

## INTRODUCTION

In health management, separating financing, purchasing and the provision of services requires more precise instruments and measurement of healthcare activity<sup>1-2</sup>. Various countries are developing methods of per capita funding as a mechanism for allocating health care resources in a given region<sup>3</sup>. The Adjusted Clinical Groups (ACG) Case-Mix System is a system of risk adjustment that classifies persons according to the diseases they present over a given period. The main objective is to measure the degree of disease in patient populations according to different levels of morbidity<sup>4-5</sup>.

Classification systems for ambulatory patients, especially primary healthcare (PHC) patients, have not been widely used even in the USA, where they mainly originated. In addition, there is some uncertainty about the adaptive capacity of these instruments in health fields other than that for which they were designed. These classification systems relate the burden of disease, consumption of resources and the real costs of care<sup>6-11</sup>. Therefore, studies aimed at improving knowledge of the relationships between these factors can provide valuable evidence.

In general, ACG are accepted as useful in our setting and their use is increasing in various areas. However, some ACG categories seem to have excess variability and therefore we decided to study the performance of each ACG category in PHC centers in Catalonia<sup>6,12-13</sup>.

The aim of this study was to identify the retrospective adaptive capacity and poorly-performing categories of the ACG system according to the cost of care in various PHC centers in Catalonia (Spain) in daily clinical practice.

## METHODS

### *Design and study population*

We conducted a retrospective, multicenter study based on computerized medical records of PHC patients. All records were dissociated to ensure the confidentiality of the data. The study population consisted of all patients (N=310,235) assigned to thirteen PHC centers in Catalonia belonging to four service providers. The patient population was predominantly urban, lower-middle class, with industrial occupations. All centers included provide universal free-at-the-point-of care healthcare with private provision of services in concert with the Catalan Health Service. All patients registered in the study centers who required care between January 1 and December 31, 2008 were finally studied. Patients not registered in the study centers during the study period were excluded.

### *Data retrieval and processing*

Dependent variables were defined as the mean number of episodes and the direct costs of PHC. The independent variables analyzed were: age, sex, care provider and clinical service (family medicine [age  $\geq 15$  years] and pediatrics [age 0-14 years]). An episode or reason for consultation was considered as a care process equivalent to a diagnosis. The health problems diagnosed were coded using the International Classification for Primary Care (ICPC-2)<sup>14</sup>. A conversion (mapping) from ICPC-2 codes to ICD-9-CM was made by a working group (one documentalist, two clinicians and two technical consultants). Relationships between the ICPC-2 and ICD-9-CM were divided into three groups: 1) no relationship (ICPC-2 code with no equivalent in ICD-9-CM), 2) one-way relationship (one ICPC-2 code with a single equivalent in ICD-9-CM, the optimal situation) and 3) multiple relationships (one ICPC-2 code with several possible equivalents in ICD-9-CM).

The following measures were used to calculate overall morbidity: a) the Charlson comorbidity index<sup>15</sup> as an approximation of severity, and b) the individual case mix index, obtained using the ACG. The operating algorithm of the ACG Grouper version 8.2 (<http://www.acg.jhsph.edu>)<sup>16</sup> consists of a series of consecutive steps that result in 106 ACG, which are mutually-exclusive groups for each patient treated.

To construct an ACG, the age, sex and the reasons for consultation or diagnosis according to ICD-9-CM are required. The first stage groups the diagnoses of the ICD-9-CM in 32 Ambulatory Diagnostic Groups (ADG) (a patient may have one or more ADG), the second step groups the ADG into 12 Collapsed Ambulatory Diagnostic Groups (CADG), the third step transforms these into 25 Major Ambulatory Categories (MAC), and finally these are transformed into an ACG category. At the end of the process, each patient is assigned to a single group with similar resource consumption. The application provides resource utilization bands (RUB), with each patient being grouped into one of five mutually-exclusive categories according to their morbidity (1: healthy users, 2: low morbidity, 3: moderate morbidity, 4: high morbidity and 5: very high morbidity)<sup>4-5</sup>.

To measure the performance or adaptive capacity of each ACG category (intra-group variability of the total cost of care) we used: a) the Pearson coefficient of variation (CV), in which a coefficient greater than 100% was considered poor performance, b) the percentage of outliers obtained through data refining of variables. The cutoff point (T) for outliers was established using the formula:  $T=Q_3+1.5(Q_3-Q_1)$ , where  $Q_3$  and  $Q_1$  are the third and first quartile of the distribution, respectively.

### *Use of resources and cost model*

The design of the system of costs took into account the information requirements and degree of development of available information systems. The unit of care product used as the basis for the final calculation was the cost per patient treated during the study period. For each patient, we differentiated fixed costs and variable costs. The main fixed costs were: staff (salaries and wages), purchases (drugs, medical supplies, etc.), outsourced services (building repair and maintenance, professional services, etc.), and a set of costs relating to structural services and center management according to the General Accounting Plan for Health Care Centers. Fixed costs were allocated per visit (mean/unit: fixed costs/total number of visits). Variable costs per patient were calculated according to diagnostic petitions (laboratory, radiology, diagnostic or therapeutic, referrals to specialists and drug prescriptions). The tariffs used to calculate costs came from analytical cost-accounting studies (see Table 1). Finally, the cost per patient was calculated as:  $C_p = (\text{mean cost per visit} \times \text{number of visits} [\text{fixed costs}]) + (\text{variable costs})$ .

### *Data confidentiality*

According to Spanish law, being a retrospective design and because it is not investigated the effectiveness of any medicine, the study does not need specific approval from an IRB or the patient's consent, but instead required the dissociation of the data. The confidentiality of records according to the Organic Law on Data Protection (15/1999, December 13) was respected by dissociating the data.

### *Data quality and statistical analysis*

In a preliminary analysis we carefully reviewed the medical records to observe their frequency and distribution and to search for possible errors in recording or coding. We performed a descriptive univariate analysis including mean values, standard deviation (SD), proportions and percentiles. The normal distribution of variables was confirmed using the Kolmogorov-Smirnov test. In the bivariate analysis, we used the chi-square test, the Student t test, ANOVA, Pearson's linear correlation and the Mann-Whitney Wilcoxon nonparametric test. To evaluate the explanatory power of the ACG System we used the coefficient of determination ( $R^2$ ) obtained from the ratio intra-group variability/total variability (ANOVA). The analysis was made using the SPSS for Windows v.18 statistical package. Statistical significance was established as  $p < 0.05$ .

## RESULTS

A total of 227,235 patients were registered in the study centers in 2008 (86.5% in family medicine and 13.5% in pediatrics). Table 2 details the general characteristics of the patient population, the comorbidity and the total costs. Patients had a mean of 4.5 (3.2) episodes and 8.1 (8.2) visits per year. The percentage of males (51.1% vs. 43.3%,  $p < 0.001$ ) and visits (9.7 versus 7.8  $p < 0.001$ ) were higher in pediatric patients. The mean age of women was higher than that of men, 39.2 versus 37.8 ( $p < 0.001$ ). The total cost was 148.7 million euros (93.3% for family medicine). Drugs were prescribed to 80.1% of patients. Fixed costs accounted for 29.1% of total costs and variable costs for 70.9% (including 47.5% on drug prescriptions). Therefore, the mean total cost per patient per year was € 654.2 (851.7), € 702.5 in Family Medicine and Pediatric € 344.6,  $p < 0.001$ . A total of 6.2% of patients were considered outliers, and after data refining the mean unitary cost per year was € 556.7. The association between the mean/unit cost according to age is shown in Figure 1.

The performance (patient distribution) and adaptive capacity (intra-group variation in categories) of the ACG classification are shown in Table 3. All patients were grouped in a category. However, no patients were grouped in 37 of the 106 categories, meaning that all patients were grouped in the remaining 69 categories. Furthermore, 61% of all patients were grouped in 10 categories and 80.9% in 19 ( $N = 183,721$ , Table 3). This distribution showed no significant differences according to the service provider. In 10 ACG categories, a poor performance (poor adaptive capacity) was observed ( $CV > 100\%$ ,  $N = 110,917$ , 48.8% of patients, Table 3 and Figure 2). The two categories with the highest CV were 1600-Preventive/Administrative ( $N = 8,527$ , 3.8%, outliers: 12.5%) and 1300-Psychosocial, w/o Psychosocial Unstable ( $N = 3,653$ , 1.6%, outliers: 10.7%).

We carried out a more-detailed analysis according to poor performance and the number of patients in each category. Table 4 shows the distribution of five ACG categories (making up 71% of poorly-performing categories,  $N = 78,887$ ). Compared with the total of 69 categories ( $N = 227,235$ ) these five categories had a lower explanatory power (coefficient of determination,  $R^2$ ) in episodes (44.3% versus 77.4%) and total costs (18.8% versus 36.9%),  $p < 0.001$ . For refined data, the results were 46.4% versus 78.4% for episodes and 36.5% versus 56.5% for total costs,  $p < 0.001$ . Category 0300-Acute Minor, Age 6 + ( $N = 26,909$ ; 11.8%) had a  $CV = 139\%$  and 6.6% of outliers and showed significant differences before and after data refining. Categories 0400-Acute Major ( $N = 8160$ ) and 1800-Acute Minor/Acute Major ( $N = 9077$ ) performed similarly. Category 4100-2-3 Other ADG Combinations, Age 35 +, had the highest number of patients ( $N = 28,864$ , 12.7%), with a high mean number of episodes (3.9 of total cases, compared to 4.5 in outliers,  $p < 0.001$ ), resulting in increased costs in these patients. The  $R^2$  of the five poorly-performing categories was 34.7%.

## DISCUSSION

This study determined the retrospective adaptive capacity of the ACG classification system according to the cost of PHC in Catalonia (Spain) in daily clinical practice, identifying 10 categories that performed poorly in the Catalan health system. In Catalonia, the use of capitation-based funding is still in its infancy compared to other European healthcare systems. The focus is on incorporating risk adjustment indicators in order to provide unbiased estimates of the expected costs of an individual patient in each health plan<sup>2-17</sup>.

There is abundant published evidence on the use and overall performance of the ACG classification, but evidence on categories that perform poorly is very limited<sup>4-7,9,12,18-23</sup>. It is expected that persons with similar morbidity and demographic characteristics will have a similar use of resources. In this respect, the available empirical evidence shows that it is technically possible to find an adjustment formula to predict at least a portion of the variation in health expenditure per person, and also that the highest predictive values are achieved by systems that incorporate diagnostic information<sup>6,21,25</sup>. This has been proven in our study, since the number of episodes showed a greater explanatory power with respect to ACG categories than the total costs. Furthermore, data refining may lessen the weight of random factors in predicting expenditure, although it is known that no system of classification of patients into RUB explains all the variation in the use of resources<sup>6-7,10,26</sup>.

In general, the Grouper requires a limited number of variables for each patient: age, sex and diagnosis (not necessarily correlated in time). This simplicity of use is compatible with the needs of PHC, which must work with large daily volumes of information, limited time for each patient, professional cooperation (doctors, nurses, social workers, etc.) and repeated visits from the same patient. However, a greater degree of computerization of PHC and the establishment of mechanisms for consensus between health professionals would be required to increase data quality and the consistency of records, especially in the identification of diagnoses<sup>11,23</sup>.

The general results of the study (demographic variables [age and sex], case mix [morbidity] and resource use levels [RUB]), fall within the parameters expected in PHC in Spain. Furthermore, the distribution of patients within ACG categories is similar to the results obtained in other studies (60% of patients are grouped in 10 ACG categories), and stable over time<sup>4,6,8-9,12,18-23,25-28</sup>.

This may be because the grouping works by binary combinations of ADG, regardless of the number of recurrences and the type of disorder<sup>4,5</sup>. For example, a patient with one or more episodes of upper

1  
2 respiratory tract infection over time, with or without concomitant pharyngitis, may remain grouped in  
3 the same ACG category, resulting in widely-differing use of resources and degree of variation in  
4 costs. This point has been suggested by some authors as a limitation of the ACG system, although  
5 recent years have seen an expansion of categories from 51 to 103 to avoid such problems<sup>23</sup>.  
6  
7  
8  
9

10 Poor performance or adaptive capacity was observed in 10 ACG categories (N = 110,917, 48.8% of  
11 patients). The two categories with the highest CV were: Preventive/Administrative and Psychosocial,  
12 w/o Psychosocial Unstable. These results are difficult to compare for several reasons: a) These  
13 categories include many different circumstances and conditions (administrative processes, preventive  
14 actions and health promotion, unstable conditions with an unpredictable risk of recurrence, etc.), b)  
15 These conditions tend to be associated with poor-quality medical records (prescriptions not linked to  
16 a diagnosis, etc.), and c) The presence of different organizational models between centers (patient  
17 circuits, etc.) as a result of health policies, causing a high degree of variability that affects the use of  
18 resources and their costs.  
19  
20  
21  
22  
23  
24  
25  
26

27 We found that five categories accounted for 71% of poor performance. In general, acute disease  
28 (0300-Acute Minor, Age 6 +, 0400-Acute Major and 1800-Acute Minor/Acute Major), representing a  
29 large number of pediatric patients, had a poor adaptive capacity. The ACG classification in Catalonia  
30 might be improved by expanding some of these categories according to age groups and, especially,  
31 by quantifying the number of episodes occurring during the study period. However, in the categories  
32 4100-2-3 Other ADG Combinations, Age 35 + and 3900-2-3 Other ADG Combinations, Males Age 18  
33 to 34, the performance with respect to classification into RUB could be improved by separating  
34 different ranges of episodes or ADG.  
35  
36  
37  
38  
39  
40  
41

42 Therefore, a possible scenario for the debate on the funding model for PHC teams could be  
43 developed using a combination of factors: a) the weighting of structural costs related to accessibility,  
44 b) the variable costs according to the case-mix (ACG) and patient complexity, adapting the  
45 classification to the country, and c) quality targets derived from the policy sought by the purchaser  
46 and expected by the customer. In this aspect, the adaptive capacity of the ACG system to the Catalan  
47 setting could be bettered by improving the definition of some categories. This would facilitate policy  
48 making using benchmarking with respect to the complexity (case mix) and efficiency of PHC centers  
49 with the population served, enabling capitation payments (risk adjustment)<sup>4,26</sup>.  
50  
51  
52  
53  
54  
55

56 The greatest limitations of the study are related to the quality of the records and information systems.  
57 Without standardization of methodologies in terms of patient characteristics and the number and  
58  
59  
60



1  
2  
3 measurement of variables, the results and their generalizability should be interpreted with caution<sup>24</sup>.  
4 In addition, possible differences between health professionals in the selection of diagnoses may  
5 contaminate the comparison of costs between groups. However, strength of the study is that the large  
6 sample size could minimize these drawbacks. The ACG system was designed to measure the health  
7 status and medical resources consumed in a set of patients and, therefore, population-based studies  
8 of risk-adjusted capitation payments and the clinical management of PHC centers may be of  
9 considerable interest in Catalonia<sup>23, 29</sup>.  
10  
11  
12  
13

## 14 15 16 17 **CONCLUSIONS**

18 The ACG system is an appropriate manner of classifying patients in routine clinical practice in PHC  
19 centers in Catalonia, although improvements to the adaptive capacity through disaggregation of some  
20 categories according to age groups and, especially, the number of acute episodes in pediatric  
21 patients, would be necessary to reduce intra-group variation.  
22  
23  
24  
25  
26  
27

28 **Funding:** This work was supported by Fondo de Investigaciones Sanitarias de la Seguridad Social (Instituto  
29 Carlos III, Majahonda, Madrid, Spain), grant number PI 08/1567.  
30  
31

32 **Competing interests:** None.  
33  
34  
35

36 **Ethics approval:** The study project was approved by the Ethics and Clinical Research Committee of the Jordi  
37 Gol Clinical Research Institute (IDIAP Jordi Gol).  
38  
39

40 **Contributors:** AS, SV, RN, CV, AP and MV planned the study. AS, RN and SV supervised the campaign  
41 registration, data entry and follow-up. AS was responsible for the statistical analysis with help from SV. AS  
42 wrote the first draft of the paper and has the primary responsibility for the final content. All authors contributed to  
43 and approved the final manuscript. AS is the head of the Catalan study.  
44  
45  
46

47 **Provenance and peer review:** Not commissioned; externally peer reviewed.  
48  
49  
50  
51  
52  
53  
54  
55  
56  
57  
58  
59  
60

**REFERENCES**

1. Rice N, Smith P. Capitation and risk adjustment in health care financing: an international progress report. *The Milbank Quarterly*. 2001;79:81-113.
2. Forrest CB, Lemke KW, Bodycombe DP, Weiner JP. Medication, diagnostic, and cost information as predictors of high-risk patients in need of care management. *Am J Manag Care*. 2009;15:41-48.
3. Rico A, Saltman RB, Boerma WGW. Organizational restructuring in European health care systems: the role of primary care. *Social Policy Admin*. 2003;37:592-608.
4. Weiner JP, Starfield BH, Steinwachs DM, Mumford LM. Development and application of a population-oriented measure of ambulatory care case-mix. *Med Care*. 1991;29:452-72.
5. Starfield B, Lemke KW, Bernhardt T, Foldes SS, Forrest CB, Weiner JP. Comorbidity: implications for the importance of primary care in 'case' management. *Ann Fam Med*. 2003;1:8-14.
6. Sicras-Mainar A, Serrat-Tarres J. Measurement of relative cost weights as an effect of the retrospective application of adjusted clinical groups in primary care. *Gac Sanit*. 2006;20:132-41.
7. Petersen LA, Pietz K, Woodard LD, Byrne M. Comparison of the predictive validity of diagnosis-based risk adjusters for clinical outcomes. *Med Care*. 2005;43:61-7.
8. Hughes JS, Averill RF, Eisenhandler J, Goldfield NI, Muldoon J, Neff JM, Gay JC. Clinical Risk Groups (CRGs): a classification system for risk adjusted capitation-based payment and health care management. *Med Care*. 2004;42:81-90.
9. Meenan RT, Goodman MJ, Fishman PA, Hornbrook MC, O'Keeffe-Rosetti MC, Bachman DJ. Using risk-adjustment models to identify high-cost risks. *Med Care*. 2003;41:1301-12.
10. Buglioli M, Bonilla M, Ortún Rubio V. Sistemas de ajuste por riesgo. *Rev Med Uruguay*. 2000;16:123-32
11. Fusté J, Bolívar B, Castillo A, Coderch J, Ruano I, Sicras A. Hacia la definición de un conjunto mínimo básico de datos de atención primaria. *Aten Primaria*. 2002;30:229-235.
12. Aguado A, Guino E, Mukherjee B, Sicras A, Serrat J, Acedo M, Ferro JJ, Moreno V. Variability in prescription drug expenditures explained by adjusted clinical groups (ACG) case-mix: a cross-sectional study of patient electronic records in primary care. *BMC Health Serv Res*. 2008;8:53.
13. Sicras-Mainar A, Serrat-Tarrés J, Navarro-Artieda R, Llausí-Sellés R, Ruano-Ruano I, González-Ares JA. Adjusted Clinical Groups use as a measure of the referrals efficiency from primary care to specialized in Spain. *Eur J Public Health*. 2007;17:657-63.
14. Lamberts H, Wood M, Hofmans-Okkes IM (eds). *The International Classification of Primary Care in the European Community. With a multi-language layer*. Oxford: Oxford University Press, 1993.
15. Charlson ME, Pompei P, Ales KL, Mackenzie CR. A new method of classifying prognostic comorbidity in longitudinal studies: development and validation. *J Chronic Dis*. 1987;40:373-383.
16. The Johns Hopkins ACG<sup>®</sup> Case-mix System version 8.2. Johns Hopkins Bloomberg School of Public Health. Baltimore, 2008.

- 1  
2  
3  
4 17. Vargas I. La utilización del mecanismo de asignación per cápita: la experiencia de Cataluña. Cuadernos de Gestión 2002;8:167-78.  
5  
6  
7 18. Fishman PA, Goodman MJ, Hornbrook MC, Meenan RT, Bachman DJ, O'Keeffe Rosetti MC. Risk  
8 adjustment using automated ambulatory pharmacy data: the RxRisk model. Med Care. 2003;41:84-  
9 99.  
10  
11 19. Rosen AK, Loveland SA, Rakovski CC, Christiansen CL, Berlowitz DR. Do different case-mix  
12 measures affect assessments of provider efficiency? Lessons from the Department of Veterans  
13 Affairs. J Ambul Care Manage. 2003;26:229-42.  
14  
15 20. Shen Y, Ellis RP. How profitable is risk selection? A comparison of four risk adjustment models.  
16 Health Econ. 2002;11:165-74.  
17  
18 21. Carlsson L, Strender LE, Fridh G, Nilsson G. Types of morbidity and categories of patients in a  
19 Swedish county. Applying the Johns Hopkins Adjusted Clinical Groups System to encounter data in  
20 primary health care. Scand J Prim Health Care. 2004;22:174-9.  
21  
22 22. Reid RJ, MacWilliam L, Verhulst L, Roos N, Atkinson M. Performance of ACG case-mix system in  
23 two Canadian provinces. Med Care. 2001;39:86-99.  
24  
25 23. Chang HY, Weiner J. An in-depth assessment of a diagnosis-based risk adjustment model based  
26 on national health insurance claims: the application of the Johns Hopkins Adjusted Clinical Group  
27 case-mix system in Taiwan. BMC Medicine. 2010;8:7.  
28  
29 24. Sackett D, Rosenberg W, Gray J, Haynes R, Richardson W. Evidence based medicine: what it is  
30 and what it isn't. BMJ. 1996;312:71-72.  
31  
32 25. Orueta JF, Urraca J, Berraondo I, Darpon J, Aurrekoetxea JJ. Adjusted Clinical Groups (ACGs)  
33 explain the utilization of primary care in Spain based on information registered in the medical records:  
34 a cross-sectional study. Health Policy. 2006;76:38-48.  
35  
36 26. Greenwald LM. Medicare risk-adjusted capitation payments: from research to implementation.  
37 Health Care Financ Rev. 2000;21:1-5.  
38  
39 27. Reid RJ, Roos NP, MacWilliam L, Frohlich N, Black C: Assessing population health care need  
40 using a claims-based ACG morbidity measure: A validation analysis in the Province of Manitoba.  
41 Health Serv Res. 2002;37:1345-64.  
42  
43 28. Kuo R, Lai MS. Comparison of Rx-defined morbidity groups and diagnosis based risk adjusters  
44 for predicting healthcare costs in Taiwan. BMC Health Serv Res. 2010;10:126.  
45  
46 29. Gosden T, Forland F, Kristiansen IS, Sutton M, Leese B, Giuffrida A, Sergison M, Pedersen L.  
47 Capitation, salary, fee-for-service and mixed systems of payment: effects on the behaviour of primary  
48 care physicians. Cochrane Database Syst Rev. 2000;(3):CD002215.  
49  
50  
51  
52  
53  
54  
55  
56  
57  
58  
59  
60

Table 1: Mean unit costs in 2008

| Health resources                 | Unit cost (€) |
|----------------------------------|---------------|
| Health visit                     | 23.62         |
| Laboratory tests                 | 22.70         |
| Conventional radiology           | 18.84         |
| Diagnostic tests/therapy         | 37.85         |
| Referral to reference specialist | 106.29        |
| Drug prescriptions               | RRPvat        |

Source: analytical accounting conducted for this study, RRPvat: recommended retail price including Value Added Tax.

For peer review only

Table 2: General characteristics of study: co-morbidity and cost model

| Characteristics                         | Total         |        |
|-----------------------------------------|---------------|--------|
| Patients                                | N = 227,235   |        |
| <i>General</i>                          |               |        |
| Number of physicians                    | 224           |        |
| Number of episodes                      | 1,020,606     |        |
| Number of visits                        | 1,834,326     |        |
| Mean age, years                         | 44.1 (23.7)   |        |
| - 25 Percentile                         | 27.0          |        |
| - 50 Percentile                         | 43.0          |        |
| - 75 Percentile                         | 67.0          |        |
| Sex (female)                            | 55.6%         |        |
| <i>General co-morbidity</i>             |               |        |
| Mean ADG                                | 3.7 (2.2)     |        |
| - 25 Percentile                         | 2.0           |        |
| - 50 Percentile                         | 3.0           |        |
| - 75 Percentile                         | 5.0           |        |
| Mean episodes                           | 4.5 (3.2)     |        |
| Mean Charlson index                     | 0.2 (0.6)     |        |
| RUB                                     | 2.4 (0.8)     |        |
| 1                                       | 16.9%         |        |
| 2                                       | 31.0%         |        |
| 3                                       | 47.9%         |        |
| 4                                       | 3.8           |        |
| 5                                       | 0.5           |        |
| Outliers (N = 14,066)                   | 6.2%          |        |
| <i>Cost model (in euros) per year</i>   |               |        |
|                                         | Mean/unit     | %      |
| - Fixed costs                           | 190.7 (193.3) | 29.1%  |
| - Laboratory                            | 51.9 (73.8)   | 7.9%   |
| - Conventional radiology                | 21.4 (34.1)   | 3.3    |
| - Complementary tests                   | 6.2 (19.6)    | 1.0%   |
| - Referrals to specialists              | 73.1 (117.3)  | 11.2%  |
| - Drug prescriptions                    | 310.8 (681.2) | 47.5%  |
| Total cost of PHC                       | 654.2 (851.7) | 100.0% |
| - Cost of family medicine               | 92.9%         |        |
| - Cost of pediatric medicine(0-14years) | 7.1.          |        |

Values expressed as mean (SD: standard deviation) or percentage; RUB: resource utilization bands, ADG: Ambulatory Diagnostic Groups, PHC: Primary Health Care.

Table 3: Distribution of ACG categories with the most patients: variability of categories

| ACG  | ACG Description                                                 | N     | %     | Cost <sup>(1)</sup> | CV   | Outliers <sup>(2)</sup> |
|------|-----------------------------------------------------------------|-------|-------|---------------------|------|-------------------------|
| 4100 | 2-3 Other ADG Combinations, Age 35+                             | 28864 | 12.7% | 776.3               | 107% | 6.5%                    |
| 0300 | Acute Minor, Age 6+                                             | 26909 | 11.8% | 169.6               | 139% | 6.6%                    |
| 4910 | 6-9 Other ADG Combinations, Age 35+, 0-1 Major ADGs             | 14876 | 6.5%  | 1,624.4             | 67%  | 4.5%                    |
| 2100 | Acute Minor/Likely to Recur, Age 6+, w/o Allergy                | 11867 | 5.2%  | 304.7               | 91%  | 5.3%                    |
| 4410 | 4-5 Other ADG Combinations, Age 45+, no Major ADGs              | 10551 | 4.6%  | 1,025.4             | 74%  | 5.3%                    |
| 4420 | 4-5 Other ADG Combinations, Age 45+, 1 Major ADGs               | 10137 | 4.5%  | 1,336.2             | 79%  | 4.6%                    |
| 0500 | Likely to Recur, w/o Allergies                                  | 9872  | 4.3%  | 187.2               | 140% | 6.6%                    |
| 1800 | Acute Minor/Acute Major                                         | 9077  | 4.0%  | 353.2               | 104% | 5.9%                    |
| 1600 | Preventive/Administrative                                       | 8527  | 3.8%  | 229.5               | 215% | 12.5%                   |
| 0400 | Acute Major                                                     | 8160  | 3.6%  | 237.3               | 160% | 8.1%                    |
| 0900 | Chronic Medical: Stable                                         | 6319  | 2.8%  | 506.7               | 114% | 6.2%                    |
| 3900 | 2-3 Other ADG Combinations, Males Age 18 to 34                  | 5877  | 2.6%  | 341.7               | 117% | 6.0%                    |
| 3200 | Acute Minor/Acute Major/Likely to Recur, Age 12+, w/o Allergy   | 5785  | 2.5%  | 525.0               | 89%  | 6.3%                    |
| 2300 | Acute Minor/Chronic Medical: Stable                             | 5756  | 2.5%  | 612.6               | 95%  | 6.3%                    |
| 3600 | Acute Minor/Acute Major/Likely to Recur/Chronic Medical: Stable | 5575  | 2.5%  | 1,022.1             | 72%  | 5.0%                    |
| 4310 | 4-5 Other ADG Combinations, Age 18 to 44, no Major ADGs         | 4168  | 1.8%  | 554.8               | 86%  | 6.4%                    |
| 4920 | 6-9 Other ADG Combinations, Age 35+, 2 Major ADGs               | 4089  | 1.8%  | 2,102.5             | 67%  | 3.5%                    |
| 2800 | Acute Major/Likely to Recur                                     | 3659  | 1.6%  | 351.0               | 102% | 6.9%                    |
| 1300 | Psychosocial, w/o Psychosocial Unstable                         | 3653  | 1.6%  | 340.4               | 175% | 10.7%                   |

Nineteen ACG categories contain 80.9% of patients (N = 183,721). No patient was grouped in 37 ACG categories; ACG, Adjusted Clinical Groups (Code)<sup>(1)</sup>: Gross cost (mean/unit in euros), CV: Pearson's Coefficient of Variation,<sup>(2)</sup>:outliers: percentage of patients, cut-off:  $T = Q_3 + 1.5(Q_3 - Q_1)$  where  $Q_3$  and  $Q_1$  are the third and first quartiles of the distribution, respectively. Total sample: N = 227235, CV = 130.0%, outliers: 6.2%.

Table 4: Distribution of five poorly-performing ACG categories according to age, episodes and cost

| ACG categories (coding and description)                     | Total | No outliers   | Outliers |               |      |                 |
|-------------------------------------------------------------|-------|---------------|----------|---------------|------|-----------------|
| Variables                                                   | N     | Mean          | N        | Mean          | N    | Mean            |
| <i>4100: 2-3 Other ADG Combinations, Age 35+</i>            | 28864 |               | 26992    |               | 1872 |                 |
| Age                                                         |       | 60.5 (14.8)   |          | 59.7 (14.6)   |      | 70.9 (12.8)     |
| Episodes                                                    |       | 3.9 (1.3)     |          | 3.9 (1.2)     |      | 4.5 (1.5)       |
| Total cost                                                  |       | 776.3 (828.2) |          | 620.3 (448.7) |      | 3026.1 (1504.4) |
| <i>0300: Acute Minor, Age 6+</i>                            | 26909 |               | 25142    |               | 1767 |                 |
| Age                                                         |       | 33.1 (16.5)   |          | 31.9 (15.4)   |      | 50.5 (22.1)     |
| Episodes                                                    |       | 1.7 (1.1)     |          | 1.7 (0.9)     |      | 2.5 (1.4)       |
| Total cost                                                  |       | 169.5 (236.5) |          | 125.2 (91.7)  |      | 800.0 (554.3)   |
| <i>1800: Acute Minor/Acute Major</i>                        | 9077  |               | 8538     |               | 539  |                 |
| Age                                                         |       | 32.1 (19.8)   |          | 30.8 (18.5)   |      | 51.6 (27.1)     |
| Episodes                                                    |       | 3.6 (1.5)     |          | 3.6 (1.4)     |      | 4.8 (2.3)       |
| Total cost                                                  |       | 353.2 (366.2) |          | 288.7 (166.5) |      | 1374.2 (843.8)  |
| <i>0400: Acute Major</i>                                    | 8160  |               | 7503     |               | 657  |                 |
| Age                                                         |       | 38.5 (18.2)   |          | 36.6 (16.7)   |      | 59.9 (20.6)     |
| Episodes                                                    |       | 1.6 (0.8)     |          | 1.5 (0.7)     |      | 2.1 (1.1)       |
| Total cost                                                  |       | 237.3 (379.5) |          | 158.3 (108.7) |      | 1139.1 (877.8)  |
| <i>3900: 2-3 Other ADG Combinations, Males Age 18 to 34</i> | 5877  |               | 5523     |               | 354  |                 |
| Age                                                         |       | 28.1 (4.5)    |          | 28.0 (4.5)    |      | 28.7 (4.2)      |
| Episodes                                                    |       | 3.3 (1.0)     |          | 3.3 (1.1)     |      | 3.8 (1.2)       |
| Total cost                                                  |       | 341.6 (399.1) |          | 273.7 (154.1) |      | 1401.2 (1040.1) |

Contrast statistic: Chi<sup>2</sup> test or Mann-Whitney Wilcoxon test; p<0.001 in all cases, ADG: Ambulatory Diagnostic Groups; coefficient of determination (R<sup>2</sup>): intra-group/total variability (ANOVA).

1  
2  
3  
4  
5  
6  
7  
8  
9  
10  
11  
12  
13  
14  
15  
16  
17  
18  
19  
20  
21  
22  
23  
24  
25  
26  
27  
28  
29  
30  
31  
32  
33  
34  
35  
36  
37  
38  
39  
40  
41  
42  
43  
44  
45  
46  
47  
48  
49  
50  
51  
52  
53  
54  
55  
56  
57  
58  
59  
60

Figure 1: Correlation of the cost of care according to age.

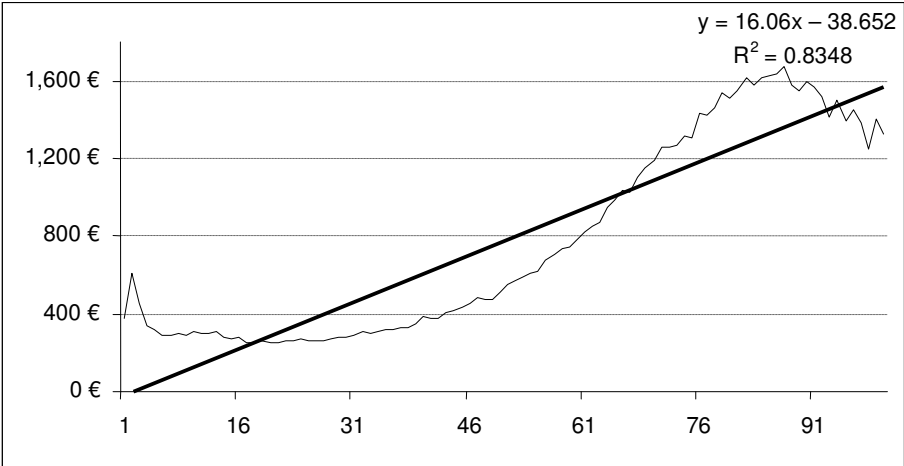

R<sup>2</sup>: Coefficient of determination

peer review only



Figure 2: Percentage distribution of coefficients of variation according to the number of categories, patients and outliers

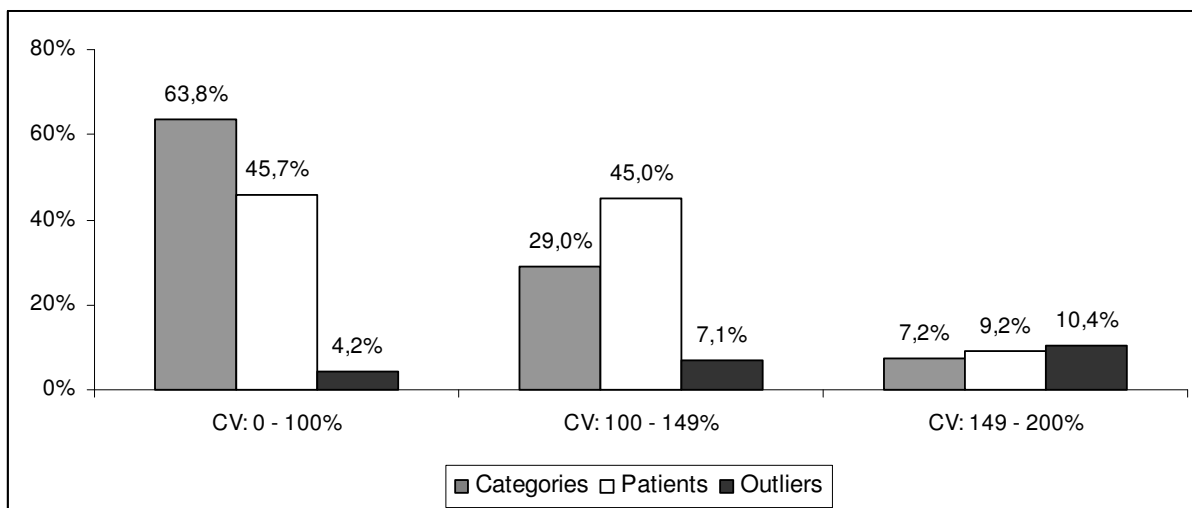

CV: Pearson's coefficient of variation; contrast statistic:  $\chi^2$ ,  $p < 0.001$  for all categories.

Peer review only
